# Supplementary material
Source: PubMed Central journal article supplement (PMC3465469)
Supplement: NIHMS398446-supplement-1.pdf [file NIHMS398446-supplement-1.pdf]

## Supplementary Figures

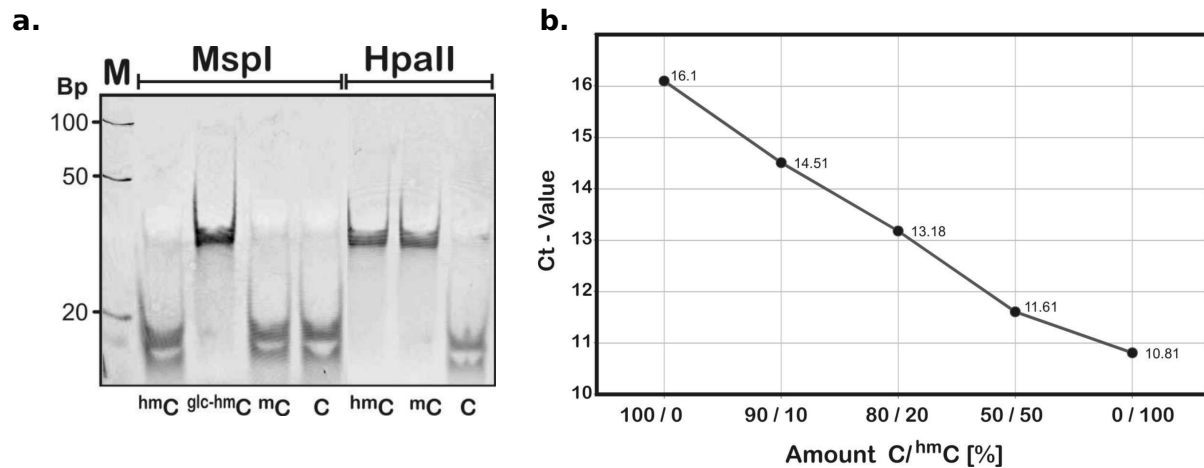

**Supplementary Figure 1:** Validation for BGT-glucosylation as an assay for 5-hmC measurement. (a) Effect of glucosylation treatment on a 31-mer DNA duplex containing 5-hmC, 5-mC or C on one strand of a CCGG target site (modified cytosine is underlined); details in Supplementary Note 1. Cleavage by MspI is only blocked by glucosylation of the 5-hmC residue (from left: lanes 1–4); HpaII digestion is inhibited when either modification, 5-mC or 5-hmC, is present at the CpG site (lanes 5–7). M – FastRuler™Ultra Low Range DNA Ladder (Fermentas). (b) Standard curve for 5-hmC estimates from real-time PCR. A 200 bp DNA fragment containing one 5-hmC-modified MspI site ( $C^{hm}CGG$ ) was spiked in different amounts into a quantity of unmodified DNA of the same sequence (x-axis; 10ng total amount). The total DNA was subjected to BGT-glucosylation (Online Methods) and subsequent treatment with 10 U of MspI at 37°C for 16 hrs, followed by quantitative real-time PCR. Quantitative PCRs were performed on a Rotor-Gene 6000 (Corbett Research) instrument using Maxima™ SYBR Green qPCR Master Mix (Fermentas) (Supplementary Note 1). The threshold cycle (Ct) values of the corresponding DNA mixtures are shown as inset.

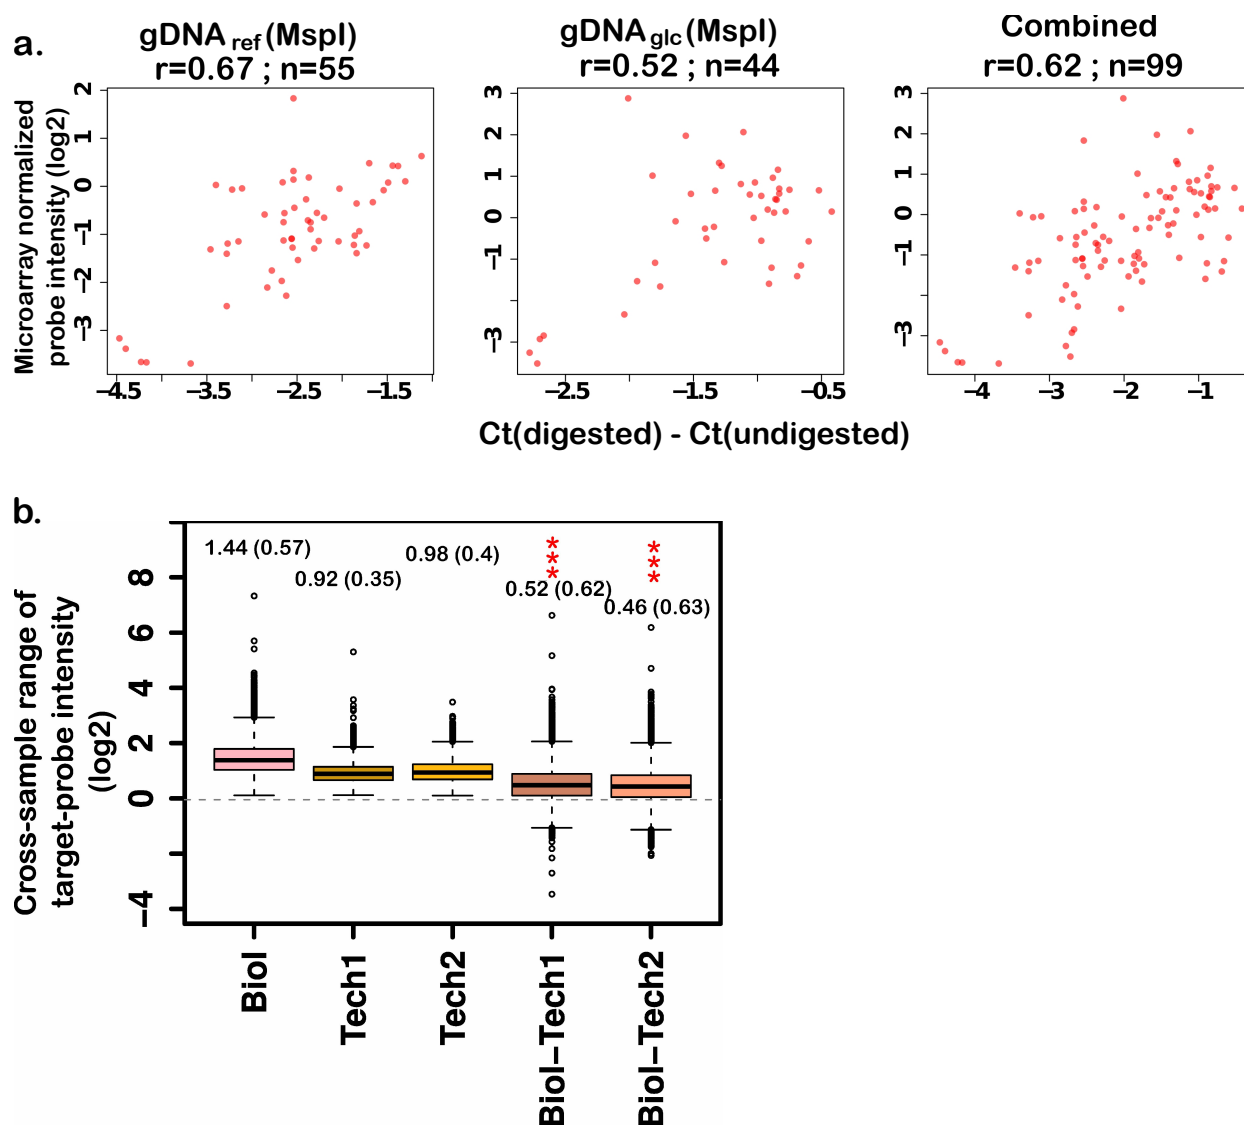

**Supplementary Figure 2:** Microarray-based validation of 5-hmC assay. (a) Correlation of digestion efficacy as measured by quantitative PCR (qPCR) and by microarray. Microarray single probe intensity (y-axis) is plotted with qPCR measures (Ct value; x-axis) at 11 arbitrarily-selected loci (Supplementary Table 3). Loci for qPCR have the property that the target site (CCGG) lay directly on a microarray probe; for each locus, DNA from 4-5 individuals was separately qPCR-amplified. Shown are correlations for (left) changes in unglucosylated genomic DNA following MspI digestion (gDNA (MspI)), (middle) changes in glucosylated genomic DNA following MspI digestion (glc-gDNA (MspI)), and (right) data from both conditions combined. The Ct has an inverse relationship with the amount of DNA fragment at the start of qPCR; i.e. a greater Ct value reflects a lower starting template to be PCR-amplified. Each dot shows individual-level (not sample-averaged) data; *n* denotes number of data points and *r* is the correlation coefficient. (b) Microarray analysis results in biological variability that exceeds technical variability. Each boxplot shows the distribution of the range of target-probe intensities. Data is shown for MspI-treated unglucosylated genomic DNA. Six biological replicates (“Biol”, pink) were compared to each of two technical replicates (“Tech1” and “Tech2”; brown, orange). Each dot measures the cross-sample range (max – min) intensity for target probes on human chromosome 5 (27,546 probes). Mean (sd) shown above each boxplot. The range of probe intensities is greater for biological replicates (“Biol – Tech1” (dark salmon); “Biol – Tech2”

(light salmon)); one-sample t-test in both cases results in p-values  $< 10^{-16}$ .

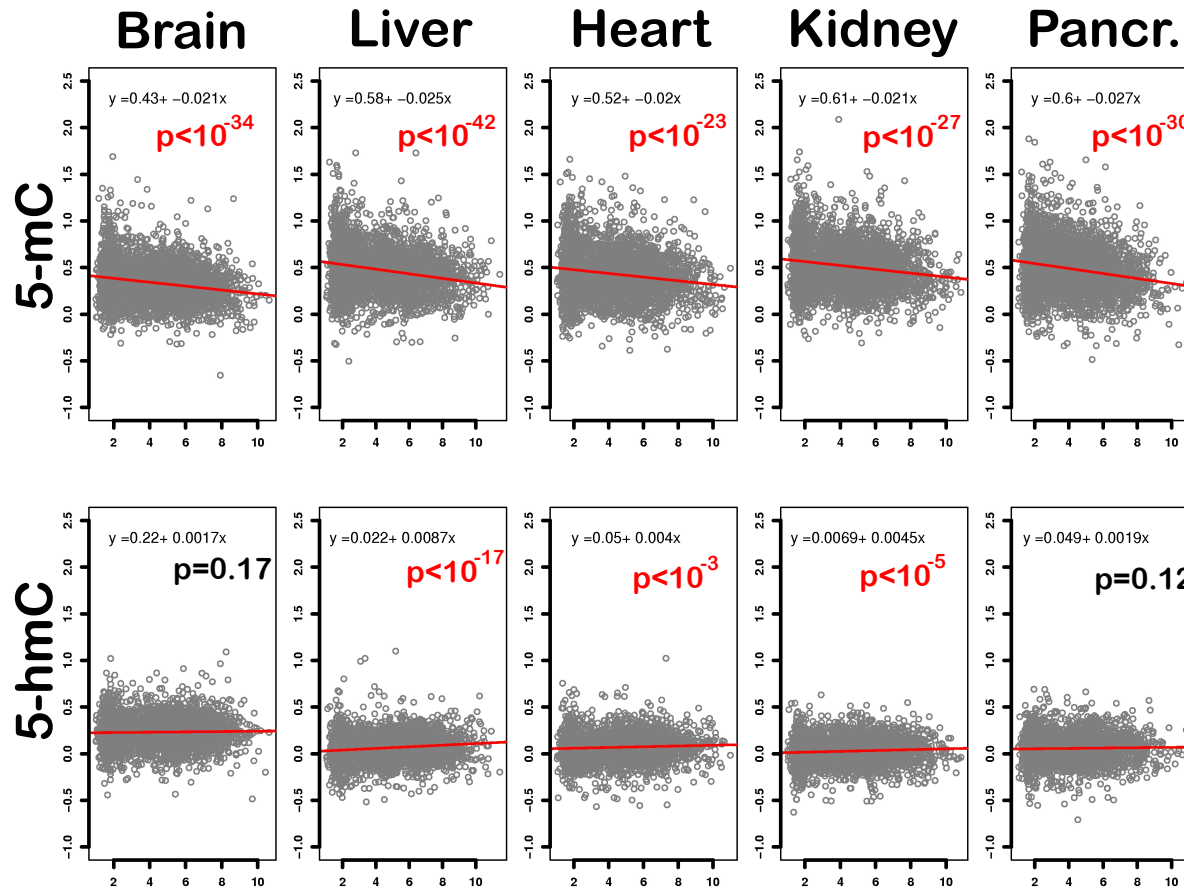

**Supplementary Figure 3:** Linear regression of steady-state mRNA levels with mean genic intensity of DNA modifications. Plots show gene-averaged (mean) mRNA levels (x-axis) against averaged probe intensities for corresponding genes (y-axis); genes defined by RefSeq ID (top: 5-mC, bottom: 5-hmC). Regression line shown in red, P-values are for slope ( $\alpha = 0.005$ ), with significant P-values shown in red. The inverse relationship of genic 5-mC and gene expression levels were consistently found in all tissues investigated. The relationship of 5-hmC and transcription levels was significant only in some non-neuronal tissues, although the slight upward trend is visible in all cases (also see Fig. 1c).

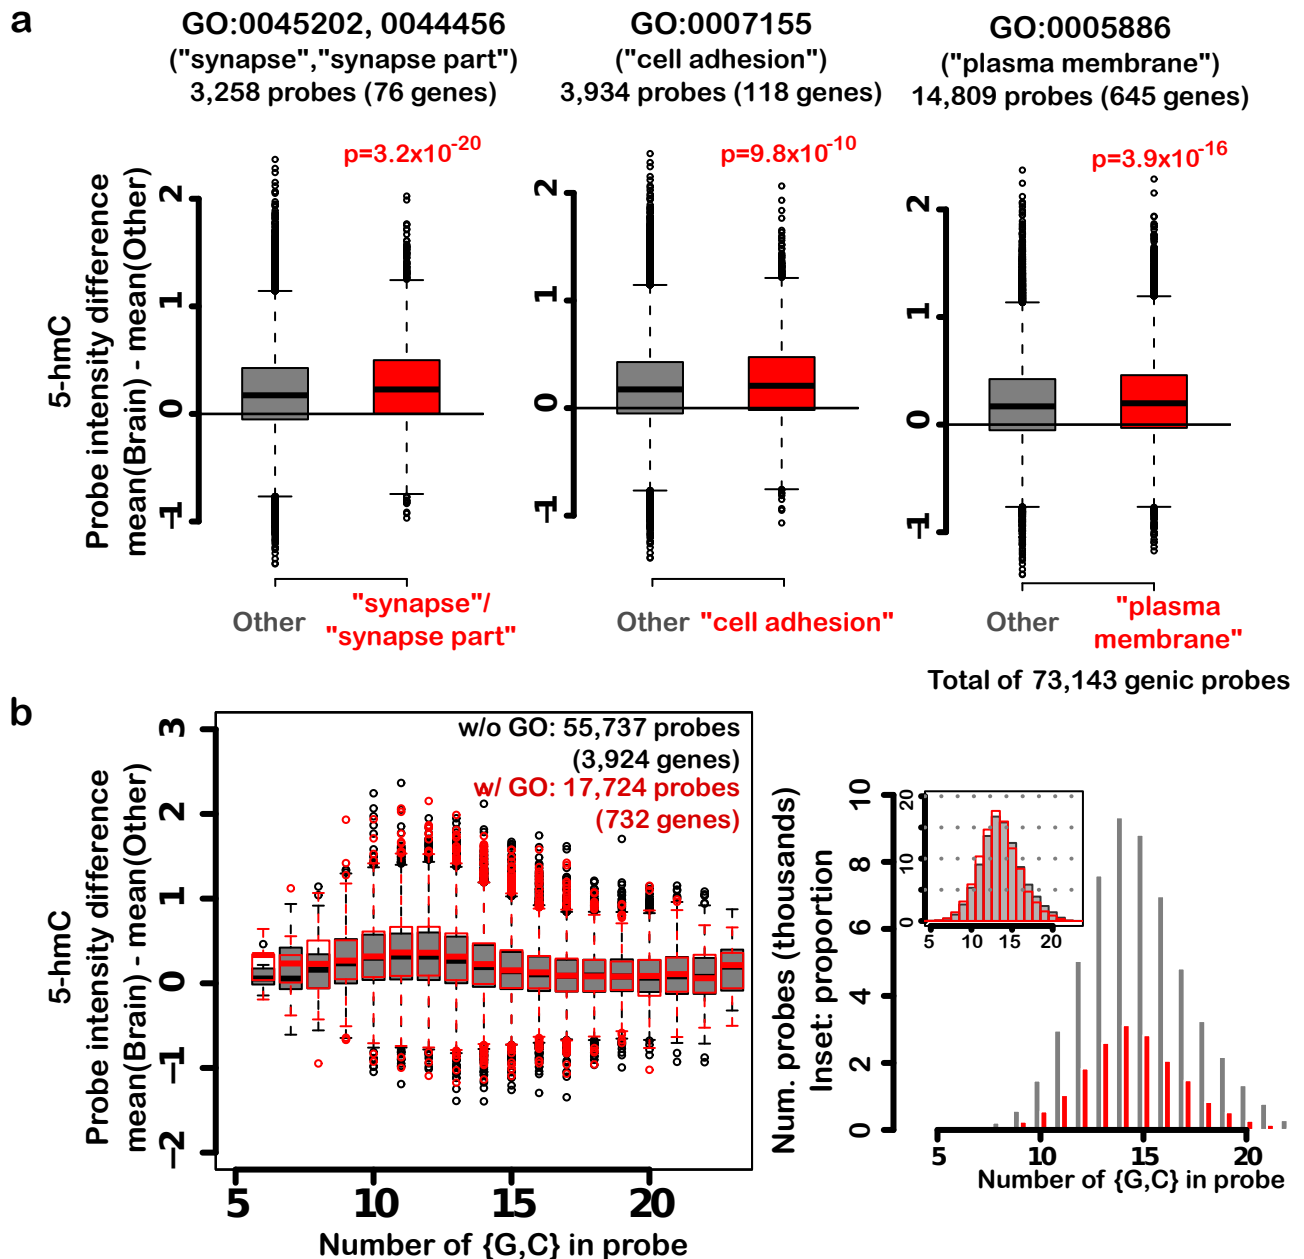

**Supplementary Figure 4:** 5-hmC in the adult mouse brain is higher in genes mapped to synapse-related categories, compared to that in genes outside these categories. (a) Probes in genes mapped to each Gene Ontology (GO) category (red) had greater cross-tissue differences (Brain-Other) than those in other genes (gray). The GO categories tested were the top three categories overrepresented in brain 5-hmC rich genes (Table 1); this result generalizes the observation in enriched genes to all genes in these categories. Each dot measures the difference in probe intensity between brain samples and samples from other tissues; probes were not averaged within genes. (P-values from two-tailed WMW test,  $\alpha = 0.016$ ). (b) Probe-level differences persist even after probe stratification by GC content. This panel shows probes combined for all three GO terms tested in (a) (red), compared to other probes (gray). (Left): Increase in 5-hmC levels is evident, particularly in strata with most probes ( $9 \leq GC \leq 16$ ). This increase is more pronounced for individual GO categories (not shown). (Right): Number of probes in each GC-stratum, (inset: probe proportions).

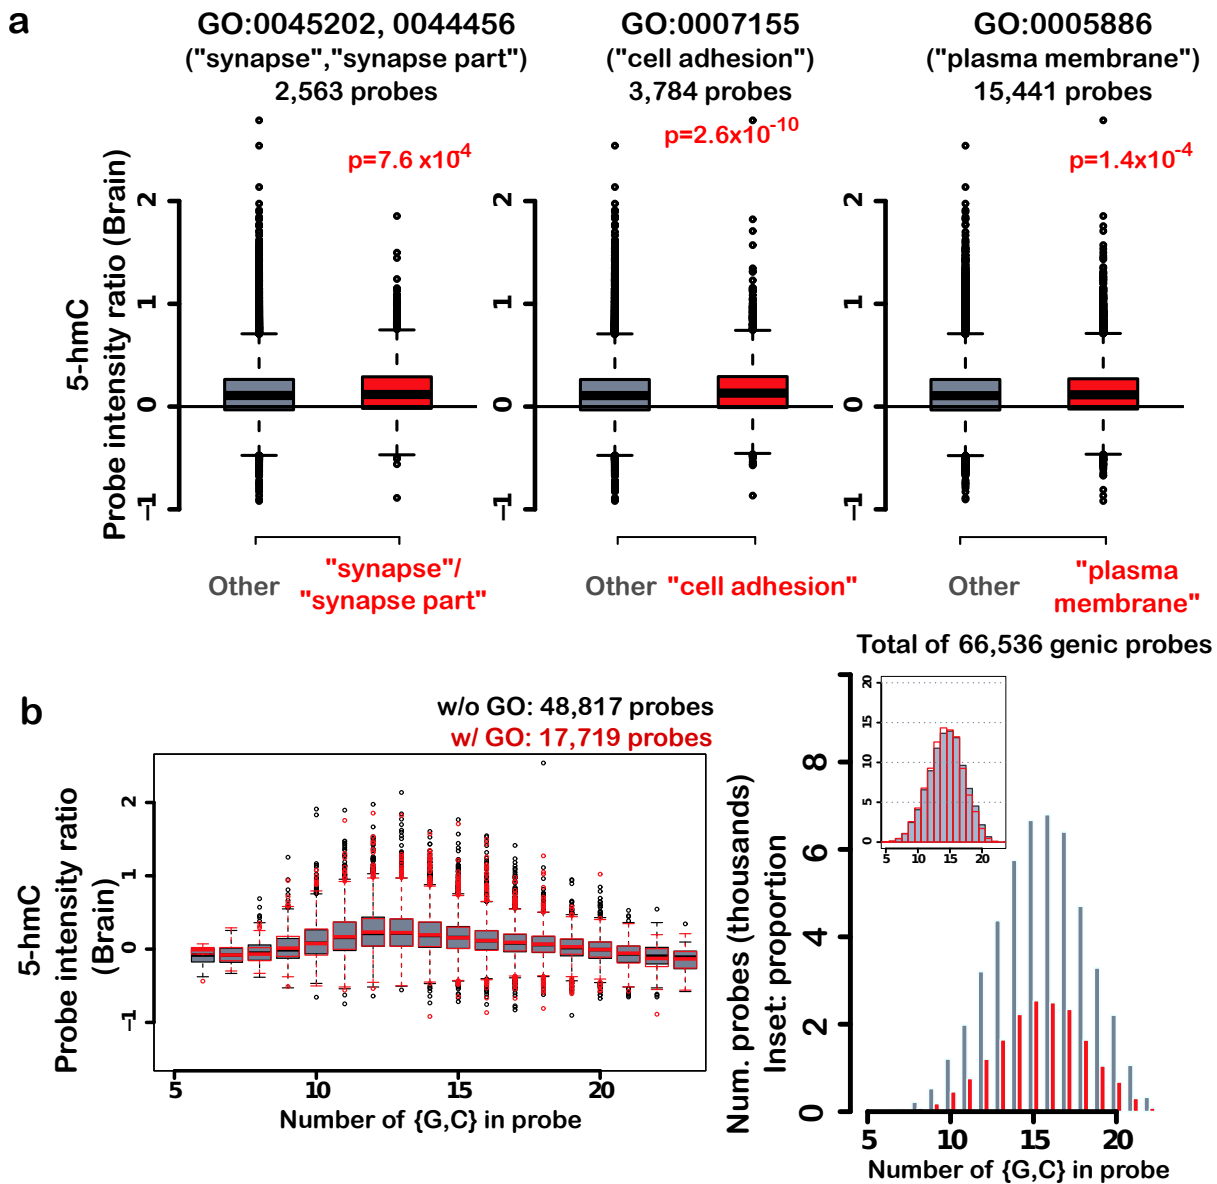

**Supplementary Figure 5:** 5-hmC in the adult human brain is higher in genes mapped to synapse-related categories, compared to that in genes outside these categories. (a) Probes in genes mapped to each GO category (red) had higher density of 5-hmC than those in other genes (gray). The GO categories tested were the same as those tested in the mouse (Supplementary Fig. 4). Each dot measures probe-level 5-hmC (sample-averaged). Probes were not averaged within genes. (b) Probe-level intensities with probe stratification by GC content. This panel shows probes combined for all three GO terms (red, "w/ GO"), compared to other probes (gray, "w/o GO"). (Left): 5-hmC intensity (Right): Number of probes in each GC-stratum (Inset: probe proportions).

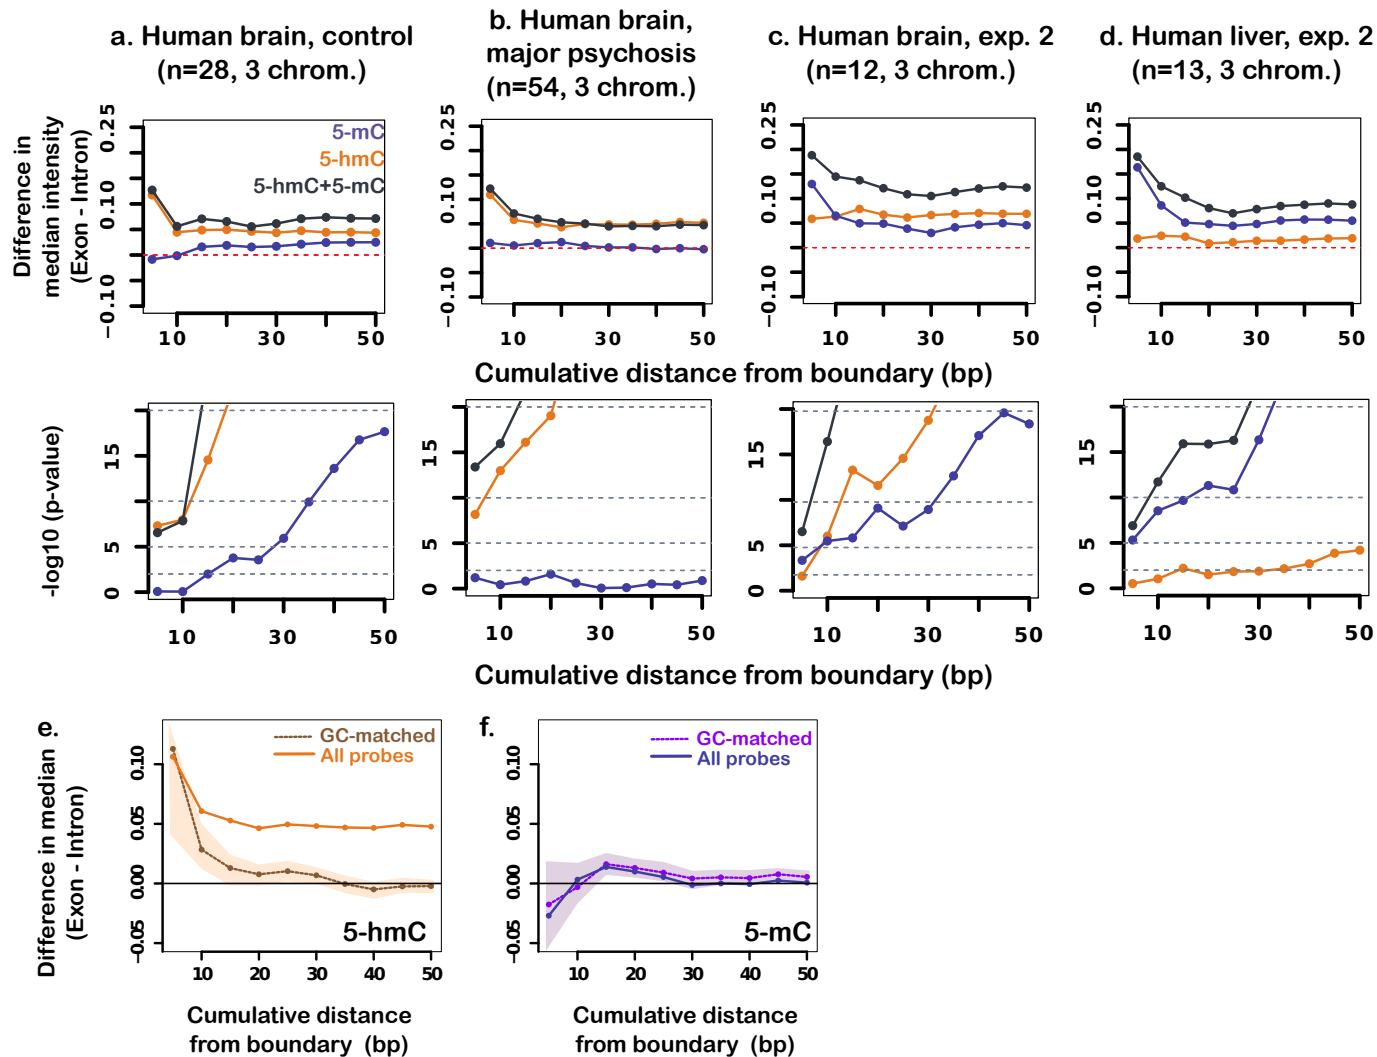

**Supplementary Figure 6:** Exonic increase in DNA modifications in human tissues. (a-d) show cross-boundary changes in DNA modifications in human tissues, for various cumulative distances ( $d = 5 - 50$  bp). Data are shown for (a) human brains without diagnosis of mental illness ( $n = 28$ ; 6 chromosomes), (b) human brains from individuals diagnosed with major psychosis ( $n = 54$ , 3 chromosomes), and for (c,d) an independent experiment on age- and sex-matched (c) brain and (d) liver samples. In each case, the top panel shows median exonic increase in DNA modifications at various cumulative distances from the exon-intron boundary, and the bottom panel shows corresponding informal P-values from statistical comparison of exonic and intronic probe intensities (linear mixed-effects model, see Online

Methods). In brain samples (a-c), exonic increase in all DNA modifications (black) is predominantly mirrored by changes in 5-hmC (orange), and to a lesser extent in 5-mC (purple); in the liver (d), this pattern is reversed. (e,f) Exon-intron peri-boundary differential after probes on either side of the boundary are matched for GC content, at various cumulative distances from the boundary (100 iterations of matching; trendliens show median, shaded areas show the range between the 5th and 95th percentile of differences). (e) Following GC-matching, exonic increase in 5-hmC levels are notable at  $d = 5$  and persist up to 20 bp in the peri-boundary region. (f) The relatively modest change in 5-mC persists after GC-matching. At  $d = 5$ , zero lies within the range of GC-matched values. Following GC-matching, 5-hmC and 5-mC values are similar for peri-boundary distances greater than 10bp. It is unclear at present whether this similarity is due to loss of statistical power from GC-matching.



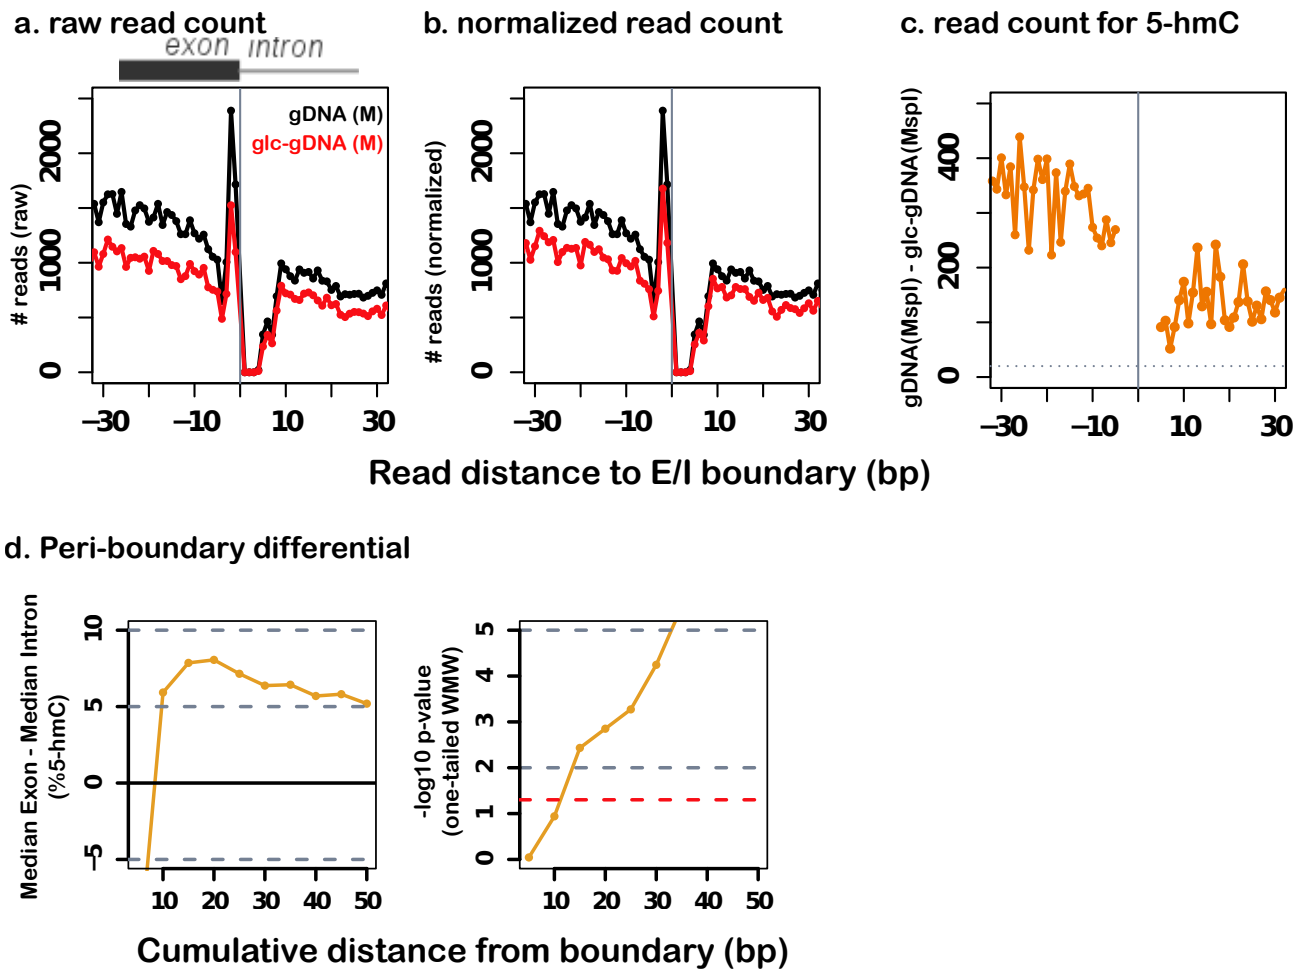

**Supplementary Figure 7: 5-hmC changes measured at exon-intron boundary using single molecule sequencing (SMS).** One brain sample (cortex Brodmann Area 10; female, age at death 49 years, no diagnosis of brain disease) was analyzed (3 replicates) for DNA modifications on SMS (Supplementary Table 13). 5-hmC was estimated as the percent difference in read count of non-glucosylated DNA and that in glucosylated DNA, following MspI restriction digestion. In all panels, the x-axis shows the distance from the second cytosine in the target site (CCGG) of a read generated by a CCGG sequence, relative to an exon-intron boundary. The y-axis shows: (a) raw read count, (b) read count normalized by reads in unglucosylated channel, and (c) the difference in reads from restriction-digested DNA with and without glucosylation. (d) shows exonic increase in % 5-hmC at various cumulative distances from the boundary. The x-axis is the cumulative distance (in bp) from the second cytosine of a target read to an exon-intron boundary. Left: Percent difference in reads obtained with and without glucose protection of MspI sites. Right: P-values from comparison of exonic and intronic % 5-hmC at distances corresponding to the left graph (one-tailed Wilcoxon Mann Whitney test,  $n = \text{Distance (in bp) from the boundary}$ ).

**a. Human brain, MBD assay**

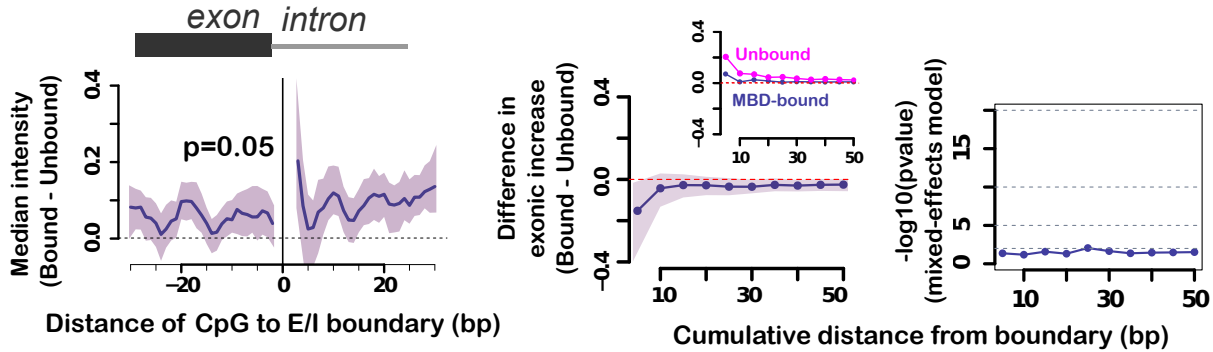

**b. Neuronal cell line**

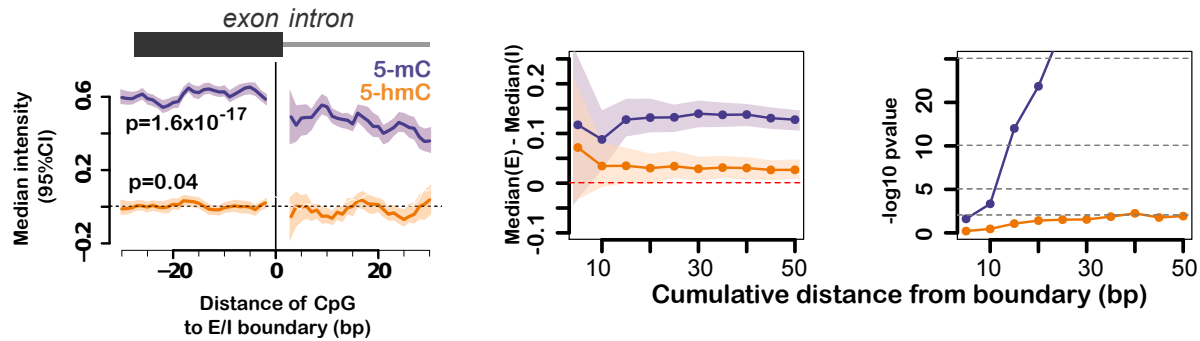

**Supplementary Figure 8:** Validation of cross-boundary change in brain samples as being due to 5-hmC. (a) Exon-intron boundary comparisons in DNA enriched for 5-mC, relative to that depleted in 5-mC. Sample genomic DNA (gDNA) from one human brain ( $n = 6$  technical replicates) was separated into a 5-mC rich fraction ('bound', Methyl Miner Kit (Invitrogen)) and the rest ('unbound'). Both fractions were then analyzed for 5-mC following glucosylation and restriction enzyme treatment (as in Fig. 1a) on human tiling array chip E (chr 5,7,16). (Left): Junction detail showing the relative increase in 5-mC in the MBD-bound fraction. Compared to the unbound fraction, the bound fraction shows an intronic increase at the boundary. Shaded regions show bootstrapped ( $R = 1,000$ ) 95 % CI. (Middle, Right): Changes in the bound fraction at various cumulative distances from the boundary (Inset: bound and unbound fractions). Middle: relative intensity; dip at 5 bp indicates intronic increase in 5-mC at the boundary. Right: informal p-values of cross-boundary comparisons. Shading shows 95 % CI from separately bootstrapping exonic and intronic values prior to subtraction ( $R = 1,000$ ). (b) DNA modifications at exon-intron boundary in a mouse neuronal cell line with low global levels of 5-hmC. This cell line (mHypoA-2/24) has negligible amounts of 5-hmC (thin-layer chromatography, not shown; microarray, Supplementary Table 12) ( $n = 24$ , 3 chromosomes). Consistent with globally undetectable levels of 5-hmC, the main change at the exon-intron boundary was that in 5-mC rather than 5-hmC. (Left): Probe intensities in the region immediately around the exon-intron boundary. (Middle): median exonic increase at various cumulative distances from the boundary; (Right) informal p-values (linear mixed-effects model, Online Methods) for exon-intron comparisons.

a. 5-hmC

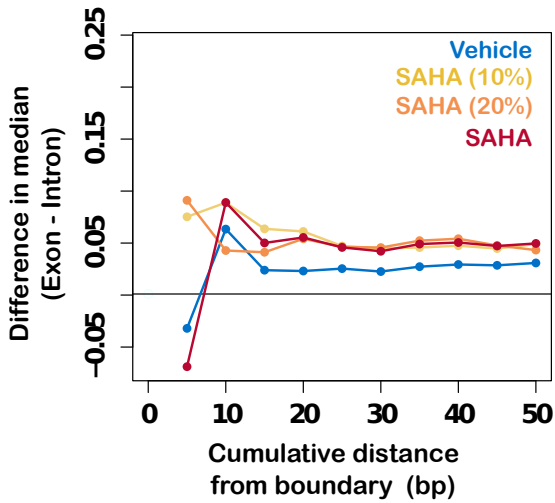

b. 5-mC

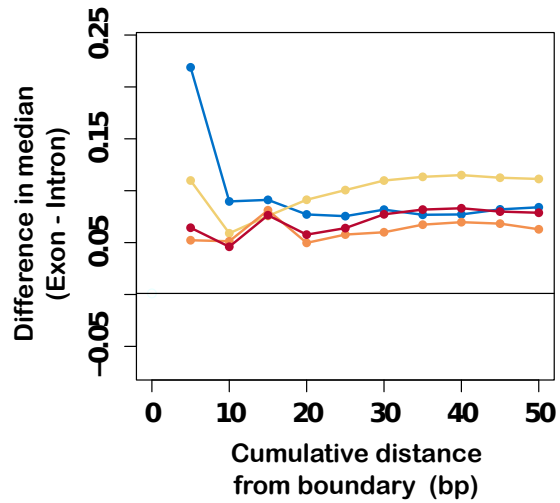

**Supplementary Figure 9:** DNA modifications at the exon-intron boundary in B-lymphocytes following treatment with suberoylanilide hydroxamic acid (SAHA). Graphs show the exon-intron differential at various cumulative distances from the boundary. Treated cells showed an increase in cross-boundary differences that approximately corresponded to increasing doses of SAHA (10 % , 20 % full dose of SAHA (0.1 $\mu$ M)), relative to vehicle-treated control cells. Data for each trendline is an average of six technical replicates. (a) 5-hmC levels at the exon-intron boundary are higher in SAHA-treated samples (warm colors), relative to vehicle-treated samples (blue). (b) 5-mC levels show the opposite trend of decreasing with SAHA treatment. SAHA may also modulate splicing outcomes by changing the levels of DNA modifications at the exon-intron boundary.

## Supplementary Tables

| Dataset                                                 | Num. biological samples | Num. arrays (biological + technical replicates) | Array name, chroms    | Num. CCGG probes <sup>a</sup> |
|---------------------------------------------------------|-------------------------|-------------------------------------------------|-----------------------|-------------------------------|
| <b>Human</b>                                            |                         |                                                 |                       |                               |
| Brain, BA10 (Stanley & Maclean, controls)               | 28                      | 84                                              | E: 5,7,16             | 69,252                        |
| Brain, BA10 (Stanley & Maclean, controls)               | 28 <sup>b</sup>         | 84                                              | F: 8,11,12            | 67,225                        |
| Brain, BA10 (Stanley & Maclean, psychosis)              | 54                      | 162                                             | E: 5,7,16             | 69,252                        |
| Brain, BA10 (Stanley), for MBD                          | 6 <sup>b</sup>          | 12                                              | E: 5,7,16             | 69,252                        |
| Exp 2, Liver (Curline & Cambridge Biosci.)              | 13                      | 39                                              | E: 5,7,16             | 69,252                        |
| Exp 2, Brain (Stanley, controls)                        | 12 <sup>b</sup>         | 36                                              | E: 5,7,16             | 69,252                        |
| B-lymphocyte cell line                                  | 24                      | 72                                              | G: 10,13,14,17        | 76,102                        |
| <b>Mouse</b>                                            |                         |                                                 |                       |                               |
| Multiple organs (brain, liver, pancreas, kidney, heart) | 32                      | 141                                             | A, G: 1,9,10,13,14,19 | 130,314 <sup>c</sup>          |
| Neuronal cell line (mHypoA-2/24)                        | 6                       | 54                                              | B: 2, X,Y             | 46,892                        |
| Frontal cortex                                          | 15                      | 45                                              | A: 1,9,19             | 69,052                        |
| Brain, non-frontal cortex                               | 15                      | 45                                              | A: 1,9,19             | 69,052                        |
| <b>Total</b>                                            | <b>187</b>              | <b>774</b>                                      |                       |                               |

a) After excluding repeat overlaps; b) Biological samples excluded from running total as already previously counted; c) this probe count is lower than that in the synapse-related analyses because this analysis has an additional filter: probes where the chromosomal and Affymetrix probe sequence did not both contain a target site were excluded.

**Supplementary Table 1:** Sample, array, and probe count for all datasets analyzed in the current study. Not included is the sample count for Helicos validation, which used 3 technical replicates of a single human brain.

| Type of array measurement      | gDNA<br>(MspI) | Glu-gDNA<br>(MspI) | Combined |
|--------------------------------|----------------|--------------------|----------|
| <i># data points</i>           | 55             | 44                 | 99       |
| Single probe                   | 0.67           | 0.52               | 0.62     |
| Probe-averaged window (340 bp) | 0.02           | -0.29              | 0.09     |
| Weighted window (340 bp)       | 0.20           | -0.15              | 0.27     |
| Probe-averaged window (100bp)  | 0.42           | 0.03               | 0.39     |
| Weighted window (100bp)        | 0.51           | 0.17               | 0.48     |

**Supplementary Table 2:** Correlation of sequence quantity at 11 loci, as measured by quantitative PCR and by microarrays. Correlation deteriorates dramatically for glucosylated DNA, when window-based averaging is used in arrays. The reason for this drop in correlation is not understood. Based on these results we decided to analyze arrays at the single probe level, without window-based averaging. qPCR coordinates provided in Supplementary Table 3.

| F Primer                 | R Primer                   | qPCR<br>start | qPCR<br>stop | Amplicon<br>Length<br>(bp) |
|--------------------------|----------------------------|---------------|--------------|----------------------------|
| TGCTGCTCGATGCACAGGT      | CATCTTCACCTTCCTGCTGAG      | 179497224     | 179497310    | 86                         |
| CAGTCTCTCCCTGCACACAG     | GTGGCATGGTCTGGTTCC         | 178618590     | 178618677    | 87                         |
| CCAAATTATAAGACAGATGCCTAG | GCCAACTTCTGTGAAACTACT      | 53342655      | 53342775     | 120                        |
| CAGTGCCTTAGGCCTCTCTC     | CTTGGTCTGCCATCTTCTGG       | 131634481     | 131634574    | 93                         |
| GAAAGGTGAGCTCCCTGAAG     | AAGCAAACGCTGGCTGAG         | 176792842     | 176792935    | 93                         |
| TGAGTAGTCATGACCCCTTTC    | CCAGGGTGTAACATGAATAGGA     | 161334060     | 161334151    | 91                         |
| CTCTTTGGTTCAACTGGTCCA    | CTCTCAGAATCCCAACCAGGA      | 168636029     | 168636112    | 83                         |
| GCCCTTGACTGCCTCCTTAT     | TTCCAGGACCCTAAAAAGCTC      | 16648811      | 16648944     | 133                        |
| CTTGCTGGTCAGATGACAG      | TGC CTC TCC ATC TAG CAT CC | 111684652     | 111684729    | 77                         |
| TGGTTCTTTACCCATTAGTCATA  | CAGGGATCTGATGTGCCATAT      | 93076322      | 93076426     | 104                        |
| ACCCACCTGTGTAAGCCTGT     | AGG AAC TCA GGA GAG CAG GT | 169707109     | 169707244    | 135                        |

**Supplementary Table 3:** Primers used for quantitative PCR experiments. These experiments were used to identify the optimal normalization algorithm. All probes are located on human chromosome 5 (*hg18*).

| 5-hmC % (relative to 5-mC) |          |      |     |
|----------------------------|----------|------|-----|
|                            | Sample   | Mean | SD  |
| <b>Human</b>               | Brain    | 18.6 | 2.6 |
| <b>Mouse</b>               | Heart    | 5.1  | 0.4 |
|                            | Kidney   | 6.0  | 0.1 |
|                            | Brain    | 13.6 | 0.1 |
|                            | Liver    | 8.8  | 0.3 |
|                            | Pancreas | 2.8  | 0.8 |

**Supplementary Table 4:** Thin layer chromatography quantification of 5-hmC. 5-hmC was estimated in 20 human *postmortem* brain gDNA samples (age range 34 – 85 years). Mouse: Brain, heart, kidney, and liver samples were obtained from a 24-month animal, and the pancreas sample from a 8-week old mouse (male). Standard deviation (SD) from 3 technical replicates per sample.

| Array type | Animal num. | Age    | Brain | Heart | Liver | Pancreas | Kidney |
|------------|-------------|--------|-------|-------|-------|----------|--------|
| G          | 1           | 8wk    | 71B   | 72H   | 73L   | 74P      | 75K    |
| G          | 2           | 24mos  | 136B  | 137H  | 138L  | 139P     | 140K   |
| G          | 3           | 18 mos | 121B  | -     | -     | -        | -      |
| G          | 4           | 8wk    | 91B   | 1H    | 61L   | 121P     | 31K    |
| G          | 5           | 8wk    | 92B   | 2H    | 62L   | 122P     | 32K    |
| G          | 6           | 8wk    | 95B   | -     | -     | -        | -      |
| A          | 5           | 8wk    | 92B   | 2H    | 62L   | 122P     | 32K    |
| A          | 1           | 8wk    | 71B   | 72H   | 73L   | 74P      | 75K    |
| A          | 4           | 8wk    | 91B   | 1H    | 61L   | 121P     | 31K    |
| A          | 7           | 8wk    | 93B   | 3H    | 63L   | 123P     | 33K    |
| A          | 8           | 8wk    | 51B   | 52H   | 53L   | 54P      | 55P    |

**Supplementary Table 5:** Sample information for the mouse tissue dataset. All animals were adult male inbred C57/BL6 strain mice; in several instances, multiple tissue samples were collected from the same animals (Animal num.). Not shown in table: An independent set of mouse brains was separated into frontal cortex and the remainder (including brain stem and cerebellum; 8-week old mice;  $n = 15$ ). This set was used for the characterization of exon-intron boundaries in mouse brain. In this case, sample genomic DNA was processed for DNA modification profiling (Online Methods, Fig. 1a) and hybridized to mouse chip G.



**Supplementary Table 6:** List of genes with differential 5-hmC in the adult mouse brain, relative to other tissues.

|               |               |               |               |
|---------------|---------------|---------------|---------------|
| Cnksr3        | Pkib          | BC030307      | Rdh7          |
| Oprm1         | Edar          | 1700113H08Rik | Smarcc2       |
| Rgs17         | Sh3rf3        | Pah           | Pitrm1        |
| Fbxo5         | Sept10        | 4930547N16Rik | Pfkip         |
| Syne1         | Oit3          | Dram1         | Adarb2        |
| Mthfd11       | Ccdc109a      | Mybpc1        | Dip2c         |
| Plekhg1       | Cbaral        | Ano4          | Chrm3         |
| Ppp1r14c      | Dnajb12       | Anks1b        | Ryr2          |
| Ppil4         | Ascc1         | Elk3          | Lyst          |
| Tab2          | Spock2        | Ntn4          | Hecw1         |
| Ust           | Cdh23         | Vezt          | Gli3          |
| Sash1         | Unc5b         | Fgd6          | Rala          |
| Samd5         | Adamts14      | Plxnc1        | Pou6f2        |
| Grm1          | X99384        | Nudt4         | Amph          |
| Shprh         | Lrrc20        | Eea1          | Elmo1         |
| Epm2a         | Col13a1       | Mir297a-6     | Aoah          |
| Utrn          | Supv31l       | Epyc          | Scgn          |
| Phactr2       | Ddx21         | Gm10754       | Lrrc16a       |
| Hivep2        | Ccar1         | Atp2b1        | Dcdc2a        |
| Nhs1l         | Herc4         | Tmtc3         | Cdkal1        |
| Pde7b         | Ctnna3        | Mgat4c        | Mboat1        |
| Ahi1          | Ado           | Nts           | Irf4          |
| Eya4          | Zfp365        | Slc6a15       | Gmds          |
| Moxd1         | Rtkn2         | Tmtc2         | 1700026J04Rik |
| Ctgf          | Arid5b        | BC067068      | Fars2         |
| Arg1          | 1700040L02Rik | Ppfia2        | F13a1         |
| Akap7         | Ank3          | Lin7a         | Riok1         |
| Samd3         | Ccdc6         | Ptprq         | Bmp6          |
| Lama2         | Fam13c        | Gm6924        | Elovl2        |
| Ptprk         | Bicc1         | Syt1          | Gm10790       |
| Themis        | Tfam          | Nav3          | Phactr1       |
| 6330407J23Rik | Zwint         | Osbpl8        | Rnf182        |
| Trmt11        | Pedh15        | Kcnc2         | Atxn1         |
| Nkain2        | Cabin1        | Trhde         | Rbm24         |
| Nt5dc1        | Gm5134        | Tph2          | Cap2          |
| Hs3st5        | Slc5a4b       | Tmem19        | Kif13a        |
| Hdac2         | Pebp3         | Lgr5          | Shc3          |
| Fyn           | Col18a1       | Tspan8        | Sema4d        |
| Rev3l         | Adarb1        | Ptpr          | Sykb          |
| Cdk19         | D10Jhu81e     | Kcnmb4        | Ror2          |
| Cdc40         | Abca7         | Cpm           | 4732471D19Rik |
| Sesn1         | Tmprss9       | Slc35e3       | Cdhr2         |
| Armc2         | Zbtb7a        | Grip1         | Unc5a         |
| Foxo3         | Tjp3          | Msrb3         | Grk6          |
| Nr2e1         | Ncln          | Lemd3         | Pdlim7        |
| Sobp          | Gna11         | Tbc1d30       | H2afy         |
| Bend3         | BC025920      | Gns           | Slc25a48      |
| Rtn4ip1       | Nfyb          | Rassf3        | Tgfb1         |
| Aim1          | Chst11        | Xpot          | Smad5         |
| Atg5          | Slc41a2       | Srgap1        | Trpc7         |
| Prep          | A230046K03Rik | Ppm1h         | Spock1        |
| Grik2         | Rfx4          | Mon2          | Gkap1         |
| Ascc3         | Ric8b         | Fam19a2       | Slc28a3       |
| Ros1          | Btdb11        | Slc16a7       | Ntrk2         |
| Slc35f1       | Syn3          | Myo1a         | Golm1         |

|               |               |               |               |
|---------------|---------------|---------------|---------------|
| 4921517D22Rik | 1700112E06Rik | Tsc22d1       | 2010300C02Rik |
| 2010111I01Rik | Gm10248       | Enox1         | Eif5b         |
| Cdc14b        | Kenma1        | Tnfsf11       | Aff3          |
| BC018507      | Dlg5          | Akap11        | Chst10        |
| Adamts16      | Anxa11        | Dgkh          | Npas2         |
| Lpcat1        | Ii17rd        | 1300010F03Rik | Rfx8          |
| Ahrr          | Arhgef3       | Diap3         | Ii1r2         |
| Mctp1         | Erc2          | Pcdh9         | Mfsd9         |
| 9330111N05Rik | Cacna2d3      | Klhl1         | Tmem182       |
| Gpr98         | Cacna1d       | Dach1         | Mrps9         |
| Edil3         | Itih1         | Pibf1         | Col3a1        |
| Vcan          | Capn7         | Klf12         | Tmeff2        |
| Xrcc4         | Mettl6        | Mycbp2        | Hecw2         |
| Atp6ap11      | E130203B14Rik | Scel          | Ankrd44       |
| Atg10         | Wdfy4         | Ednrb         | Plel1         |
| Ssbp2         | Ldb3          | Rnf219        | 1700066M21Rik |
| Rasgrf2       | Grid1         | D130009I18Rik | 9430016H08Rik |
| Msh3          | Nrg3          | Gpc5          | Spats21       |
| Dhfr          | Gpr137c       | Gpc6          | Gm973         |
| Serinc5       | Fermt2        | Abcc4         | Sumo1         |
| Arsb          | Samd4         | Uggt2         | Carf          |
| Lhfp12        | Atg14         | Hs6st3        | Abi2          |
| Scamp1        | Peli2         | Mbnl2         | Icos          |
| Ap3b1         | 6720456H20Rik | Farp1         | Pard3b        |
| Wdr41         | Slc35f4       | Stk24         | Ccnyl1        |
| Pde8b         | Mettl3        | Dock9         | Plekhm3       |
| Sv2c          | Slc7a7        | Ubac2         | Unc80         |
| Ankdd1b       | Dhrs2         | Clybl         | Rpe           |
| Fam169a       | Rabggta       | Pcca          | Erbp4         |
| Rgnf          | Khyn          | Itgb11        | Ikzf2         |
| Mrps27        | Parp4         | Fgf14         | Mreg          |
| Mtap1b        | Zmym2         | Xkr4          | March4        |
| Ocln          | Cry11         | St18          | Ttll4         |
| Cdk7          | Atp8a2        | Pcmt1         | Acsl3         |
| Pik3r1        | Spata13       | Cspp1         | Serpine2      |
| Mast4         | Tnfrsf19      | Prex2         | Dock10        |
| Cwc27         | Sacs          | Slco5a1       | 9430031J16Rik |
| Srek1ip1      | Gucy1b2       | Prdm14        | Rhbdd1        |
| Rgs7bp        | Blk           | Ncoa2         | Col4a4        |
| Ndufaf2       | Xkr6          | Trpa1         | Sphkap        |
| Elov17        | 4930578I06Rik | Kenb2         | Dner          |
| Depdc1b       | Rp111         | Stau2         | Trip12        |
| Pde4d         | Msra          | Ube2w         | Dis3l2        |
| Rab3c         | Hmbox1        | Tcfap2d       | Inpp5d        |
| Skiv2l2       | Ints9         | Pkhd1         | Sag           |
| Ndufs4        | Fbxo16        | Tram2         | Heatr7b1      |
| Hcn1          | Pnoc          | Rims1         | Trpm8         |
| Flnb          | Adam2         | Col19a1       | Agap1         |
| Pxk           | Ptk2b         | Lmbrd1        | Iqca          |
| Fam107a       | Dpysl2        | Bai3          | Hdac4         |
| 4930452B06Rik | Bnip3l        | Khdrbs2       | Neu4          |
| Fhit          | Dock5         | Prim2         | D1Ert622e     |
| Ptprg         | Chmp7         | Rab23         | Pam           |
| Cadps         | Xpo7          | Prss39        | Cntnap5b      |
| Synpr         | Gfra2         | Uggt1         | Cdh20         |
| Top2b         | Lrch1         | Cnm4          | Phlpp1        |
| Thrb          | Lrrc63        | Actr1b        | Bcl2          |
| Gng2          | Zc3h13        | Tmem131       | Cntnap5a      |
| Myst4         | Siah3         | Inpp4a        | Tcfcp2l1      |

|               |               |               |               |
|---------------|---------------|---------------|---------------|
| Gli2          | Ncstn         | Grik4         | Dnaje13       |
| Marco         | Ccdc19        | Arhgef12      | Acpp          |
| Dpp10         | Fmn2          | Tmem136       | Cpne4         |
| Gpr39         | Grem2         | Trim29        | Aste1         |
| Nckap5        | Rgs7          | Arcn1         | Gm7455        |
| Mgat5         | Wdr64         | Tmprss13      | Rpl29         |
| Tmem163       | Pld5          | Dscaml1       | Abhd14a       |
| AA986860      | Sdccag8       | Cadm1         | Dock3         |
| Pigr          | 1700016C15Rik | Htr3a         | Cacna2d2      |
| Il19          | Adss          | Ncam1         | Traip         |
| Slc41a1       | Efcab2        | Ppp2r1b       | Qrich1        |
| Slc45a3       | Kif26b        | Layn          | Prkar2a       |
| Lemd1         | Smyd3         | Arhgap20      | Col7a1        |
| Tmcc2         | Cnst          | Crabp1        | Dhx30         |
| Dstyk         | Cabc1         | Ube2q2        | Klhl18        |
| Cntn2         | Itpkb         | Nrg4          | Arpp21        |
| Nfasc         | Lin9          | Scaper        | 2900079G21Rik |
| Atp2b4        | Trp53bp2      | Pstpip1       | Cnot10        |
| Optc          | Capn2         | Lingo1        | Cmtm8         |
| Ppfi4         | Mark1         | 1600029O15Rik | Tgfbr2        |
| Ppp1r12b      | Tgfb2         | 6030419C18Rik | Rbms3         |
| Pkp1          | Spata17       | Hcn4          | Itga9         |
| Dennd1b       | Gpatch2       | Neol          | Wdr48         |
| Kcnt2         | Esrrg         | Thsd4         | Myrip         |
| Glrx2         | Kenk2         | Itga11        | Ulk4          |
| Hmcn1         | Smyd2         | Map2k5        | D9Ert402e     |
| 1700025G04Rik | Prox1         | Megf11        | Kif15         |
| Apobec4       | Vash2         | Clpx          | Mtl5          |
| Arpc5         | Batf3         | Pcd7          | Suv420h1      |
| Smg7          | Kenh1         | Zfp609        | Rps6kb2       |
| Nmnat2        | AA408296      | Rab8b         | Kdm2a         |
| Lamc1         | Gucy1a2       | Tln2          | Pacs1         |
| Rgs8          | Gria4         | Rora          | Catsper1      |
| Cacna1e       | Birc3         | Sltm          | Mus81         |
| Acbd6         | Arhgap42      | Prtg          | Pola2         |
| Lhx4          | Cntn5         | Unc13c        | Slc22a12      |
| Cep350        | Sesn3         | Wdr72         | 2700081O15Rik |
| Fam163a       | Folr4         | Myo5a         | Slc3a2        |
| Tdrd5         | Ccdc67        | Mapk6         | Cd6           |
| Fam20b        | Fat3          | Lysmd2        | Mpeg1         |
| Rasal2        | Pde4a         | Bmp5          | Tle4          |
| Fam5b         | Cdkn2d        | E330016A19Rik | Gnaq          |
| Astn1         | Bmper         | Slc17a5       | Gna14         |
| Pappa2        | Dpy19l1       | Impg1         | Prune2        |
| Tnr           | Eepd1         | 4930486G11Rik | Pcsk5         |
| Rabgap11      | Ncapd3        | Bckdhh        | Tmc1          |
| Dnm3          | Jam3          | Pgm3          | Trpm3         |
| Prrx1         | Spata19       | Zic4          | Smc5          |
| Kifap3        | Opcml         | Slc9a9        | Mamdc2        |
| Nme7          | Ntm           | Pcolce2       | 1700028P14Rik |
| Dpt           | Ets1          | Acpl2         | Apba1         |
| Pou2f1        | Kirrel3       | Trim42        | Fam189a2      |
| Gpa33         | Cdon          | Clstn2        | Pip5k1b       |
| Fam78b        | Fez1          | Pik3cb        | Pgm5          |
| Uck2          | BC024479      | Ephb1         | Dmrt1         |
| Rxrg          | Gramd1b       | Slco2a1       | Vldlr         |
| Lmx1a         | Ubash3b       | Rab6b         | Rfx3          |
| Pbx1          | Sorl1         | Tmem108       | Glis3         |
| Sdhc          | Sc5d          | Nphp3         | Ermp1         |

9930021J03Rik  
Prkg1  
Sgms1  
Rnls  
Ifit1  
Pank1  
Htr7  
Rpp30  
Btaf1  
Cpeb3

Myof  
Pce1  
Sorbs1  
Slit1  
Lox14  
Hpse2  
Abcc2  
Cyp2c44  
Btrc  
Gbf1

Arl3  
Cnm2  
Nt5c2  
Col17a1  
Itprp  
Ccdc147  
Sorcs3  
Sorcs1  
Xpnpep1  
Gpam

Acs15  
Tcf712  
Afap112  
Trub1  
Atrn11  
Gfra1  
Slc18a2  
E330013P04Rik

**Supplementary Table 7:** Coordinates for intergenic CCGG probes with differential 5-hmC in adult mouse brain relative to other tissues (build *mm8*; half-open start).

| Chr   | Probe start coordinate | Brain avg | Other tissue avg      | P-value               | Q-value |
|-------|------------------------|-----------|-----------------------|-----------------------|---------|
| chr1  | 78846561               | 2.45      | $8.64 \times 10^{-5}$ | $2.91 \times 10^{-7}$ | 0.009   |
| chr9  | 92416795               | 1.77      | -0.15                 | $2.96 \times 10^{-7}$ | 0.009   |
| chr1  | 51146331               | 1.90      | -0.04                 | $1.02 \times 10^{-6}$ | 0.019   |
| chr1  | 72493877               | 1.76      | 0.10                  | $1.87 \times 10^{-6}$ | 0.019   |
| chr10 | 86917636               | 1.50      | -0.25                 | $1.63 \times 10^{-6}$ | 0.019   |
| chr13 | 76268792               | 2.36      | 0.75                  | $1.31 \times 10^{-6}$ | 0.019   |
| chr1  | 139633267              | 1.88      | 0.04                  | $2.63 \times 10^{-6}$ | 0.023   |
| chr14 | 119838901              | 1.35      | -0.14                 | $3.23 \times 10^{-6}$ | 0.025   |
| chr1  | 156603214              | 2.21      | 0.24                  | $4.09 \times 10^{-6}$ | 0.026   |
| chr10 | 89066698               | 1.80      | 0.02                  | $5.51 \times 10^{-6}$ | 0.026   |
| chr10 | 91257722               | 1.89      | -0.05                 | $5.26 \times 10^{-6}$ | 0.026   |
| chr14 | 83544790               | 1.36      | -0.17                 | $4.70 \times 10^{-6}$ | 0.026   |
| chr14 | 117226832              | 1.45      | -0.32                 | $4.38 \times 10^{-6}$ | 0.026   |
| chr9  | 43709321               | 1.77      | -0.07                 | $5.98 \times 10^{-6}$ | 0.026   |
| chr13 | 112370877              | 1.61      | 0.01                  | $6.45 \times 10^{-6}$ | 0.026   |
| chr1  | 77902064               | 1.95      | 0.28                  | $7.87 \times 10^{-6}$ | 0.026   |
| chr1  | 98379668               | 1.27      | -0.38                 | $8.70 \times 10^{-6}$ | 0.026   |
| chr10 | 83795353               | 1.20      | -0.13                 | $8.43 \times 10^{-6}$ | 0.026   |
| chr13 | 114468819              | 1.38      | -0.41                 | $8.68 \times 10^{-6}$ | 0.026   |
| chr9  | 25761651               | 1.93      | -0.22                 | $7.17 \times 10^{-6}$ | 0.026   |
| chr14 | 45383301               | 1.83      | -0.17                 | $1.07 \times 10^{-5}$ | 0.031   |
| chr9  | 15660435               | 1.57      | 0.07                  | $1.12 \times 10^{-5}$ | 0.031   |
| chr1  | 24884965               | 2.04      | 0.28                  | $1.18 \times 10^{-5}$ | 0.031   |
| chr1  | 96939020               | 1.62      | -0.11                 | $1.28 \times 10^{-5}$ | 0.032   |
| chr1  | 3135214                | 1.07      | -0.19                 | $1.65 \times 10^{-5}$ | 0.035   |
| chr1  | 57156744               | 1.52      | -0.03                 | $1.66 \times 10^{-5}$ | 0.035   |
| chr1  | 192199530              | 1.54      | -0.07                 | $1.54 \times 10^{-5}$ | 0.035   |
| chr10 | 118203110              | 1.39      | 0.18                  | $1.68 \times 10^{-5}$ | 0.035   |
| chr13 | 44607871               | 1.80      | 0.25                  | $1.73 \times 10^{-5}$ | 0.035   |
| chr13 | 72140572               | 1.51      | -0.07                 | $1.52 \times 10^{-5}$ | 0.035   |
| chr1  | 81617348               | 1.28      | -0.39                 | $1.83 \times 10^{-5}$ | 0.036   |
| chr1  | 88168252               | 1.69      | 0.21                  | $2.30 \times 10^{-5}$ | 0.036   |
| chr1  | 133416455              | 1.42      | 0.08                  | $2.31 \times 10^{-5}$ | 0.036   |
| chr10 | 9980174                | 1.90      | 0.01                  | $2.14 \times 10^{-5}$ | 0.036   |
| chr10 | 35925246               | 1.43      | -0.04                 | $2.09 \times 10^{-5}$ | 0.036   |
| chr10 | 68187278               | 1.19      | -0.23                 | $1.98 \times 10^{-5}$ | 0.036   |
| chr13 | 97283307               | 1.39      | -0.09                 | $2.21 \times 10^{-5}$ | 0.036   |
| chr14 | 13921293               | 1.38      | -0.13                 | $1.94 \times 10^{-5}$ | 0.036   |
| chr19 | 36396799               | 1.50      | -0.17                 | $2.05 \times 10^{-5}$ | 0.036   |
| chr1  | 13793147               | 1.06      | -0.33                 | $2.53 \times 10^{-5}$ | 0.037   |
| chr1  | 159585964              | 1.53      | 0.05                  | $2.58 \times 10^{-5}$ | 0.037   |
| chr13 | 67687899               | 1.68      | 0.20                  | $2.46 \times 10^{-5}$ | 0.037   |
| chr1  | 144913497              | 1.26      | -0.12                 | $2.82 \times 10^{-5}$ | 0.039   |
| chr19 | 20712929               | 1.34      | 0.04                  | $2.84 \times 10^{-5}$ | 0.039   |
| chr9  | 71004321               | 1.54      | 0.02                  | $2.87 \times 10^{-5}$ | 0.039   |
| chr1  | 159841792              | 1.11      | -0.35                 | $3.04 \times 10^{-5}$ | 0.039   |
| chr1  | 189092861              | 1.31      | -0.19                 | $2.96 \times 10^{-5}$ | 0.039   |
| chr13 | 49971195               | 1.70      | 0.25                  | $3.25 \times 10^{-5}$ | 0.039   |
| chr13 | 85162768               | 1.37      | -0.02                 | $3.12 \times 10^{-5}$ | 0.039   |
| chr14 | 101564081              | 1.28      | -0.14                 | $3.15 \times 10^{-5}$ | 0.039   |

|       |           |      |       |                       |       |
|-------|-----------|------|-------|-----------------------|-------|
| chr9  | 111681105 | 1.33 | -0.08 | $3.26 \times 10^{-5}$ | 0.039 |
| chr1  | 83732759  | 1.60 | 0.12  | $3.71 \times 10^{-5}$ | 0.039 |
| chr1  | 97353272  | 1.48 | 0.00  | $3.50 \times 10^{-5}$ | 0.039 |
| chr1  | 132346528 | 1.70 | 0.05  | $3.96 \times 10^{-5}$ | 0.039 |
| chr1  | 138266914 | 1.58 | 0.02  | $3.77 \times 10^{-5}$ | 0.039 |
| chr1  | 154066489 | 1.83 | -0.21 | $3.83 \times 10^{-5}$ | 0.039 |
| chr1  | 165409207 | 1.00 | -0.45 | $3.91 \times 10^{-5}$ | 0.039 |
| chr10 | 12826411  | 0.85 | -0.34 | $3.63 \times 10^{-5}$ | 0.039 |
| chr14 | 55672471  | 1.57 | 0.09  | $3.51 \times 10^{-5}$ | 0.039 |
| chr19 | 26121407  | 1.07 | -0.20 | $3.62 \times 10^{-5}$ | 0.039 |
| chr9  | 118303616 | 1.63 | 0.16  | $3.87 \times 10^{-5}$ | 0.039 |
| chr14 | 97724075  | 1.35 | -0.14 | $4.06 \times 10^{-5}$ | 0.04  |
| chr1  | 56395976  | 1.74 | 0.50  | $4.71 \times 10^{-5}$ | 0.045 |
| chr1  | 172940703 | 1.39 | -0.17 | $4.78 \times 10^{-5}$ | 0.045 |
| chr14 | 100205839 | 1.40 | -0.05 | $4.66 \times 10^{-5}$ | 0.045 |
| chr14 | 20249274  | 1.17 | -0.06 | $4.89 \times 10^{-5}$ | 0.045 |
| chr13 | 37675381  | 1.39 | 0.03  | $5.04 \times 10^{-5}$ | 0.046 |
| chr1  | 168823169 | 1.45 | 0.00  | $5.35 \times 10^{-5}$ | 0.047 |
| chr19 | 53141154  | 1.97 | 0.00  | $5.38 \times 10^{-5}$ | 0.047 |
| chr9  | 103237221 | 1.88 | -0.04 | $5.33 \times 10^{-5}$ | 0.047 |
| chr14 | 50591504  | 1.48 | 0.07  | $5.47 \times 10^{-5}$ | 0.047 |
| chr10 | 13887553  | 2.26 | 0.62  | $5.67 \times 10^{-5}$ | 0.047 |
| chr13 | 98890154  | 1.71 | 0.23  | $5.72 \times 10^{-5}$ | 0.047 |
| chr14 | 113911315 | 1.22 | -0.27 | $5.79 \times 10^{-5}$ | 0.047 |
| chr13 | 30027675  | 1.33 | -0.13 | $6.18 \times 10^{-5}$ | 0.049 |
| chr13 | 43877899  | 1.37 | -0.11 | $6.25 \times 10^{-5}$ | 0.049 |
| chr14 | 101966649 | 1.01 | -0.08 | $6.15 \times 10^{-5}$ | 0.049 |
| chr19 | 21183149  | 1.62 | -0.15 | $6.13 \times 10^{-5}$ | 0.049 |
| chr1  | 195292433 | 1.26 | -0.10 | $6.49 \times 10^{-5}$ | 0.049 |
| chr10 | 91740445  | 1.29 | -0.09 | $6.52 \times 10^{-5}$ | 0.049 |
| chr10 | 129068102 | 1.41 | 0.28  | $6.52 \times 10^{-5}$ | 0.049 |
| chr14 | 77939470  | 1.65 | 0.28  | $6.60 \times 10^{-5}$ | 0.049 |

| Functional annotation category | Annotation terms in cluster                               | <i>P</i> of term     | <i>Q</i> of term |
|--------------------------------|-----------------------------------------------------------|----------------------|------------------|
| <b>Annotation Cluster 1</b>    | <b>Enrichment Score: 2.79</b>                             |                      |                  |
| GOTERM_MF_FAT                  | GO:0005216~ion channel activity                           | $5.4 \times 10^{-4}$ | 0.16             |
| GOTERM_MF_FAT                  | GO:0022838~substrate specific channel activity            | $8.4 \times 10^{-4}$ | 0.16             |
| GOTERM_MF_FAT                  | GO:0015267~channel activity                               | $1.5 \times 10^{-3}$ | 0.18             |
| GOTERM_MF_FAT                  | GO:0022803~passive transmembrane transporter activity     | $1.5 \times 10^{-3}$ | 0.18             |
| GOTERM_MF_FAT                  | GO:0022836~gated channel activity                         | $2.6 \times 10^{-3}$ | 0.21             |
| GOTERM_MF_FAT                  | GO:0005261~cation channel activity                        | $6.1 \times 10^{-3}$ | 0.32             |
| <b>Annotation Cluster 2</b>    | <b>Enrichment Score: 2.42</b>                             |                      |                  |
| GOTERM_MF_FAT                  | GO:0005089~Rho guanyl-nucleotide exchange factor activity | $1.0 \times 10^{-3}$ | 0.15             |
| GOTERM_MF_FAT                  | GO:0005088~Ras guanyl-nucleotide exchange factor activity | $2.2 \times 10^{-3}$ | 0.21             |
| GOTERM_BP_FAT                  | GO:0035023~regulation of Rho protein signal transduction  | $2.4 \times 10^{-2}$ | 0.78             |
| <b>Annotation Cluster 3</b>    | <b>Enrichment Score: 2.05</b>                             |                      |                  |
| GOTERM_BP_FAT                  | GO:0048666~neuron development                             | $4.3 \times 10^{-3}$ | 0.48             |
| GOTERM_BP_FAT                  | GO:0031175~neuron projection development                  | $1.2 \times 10^{-2}$ | 0.65             |
| GOTERM_BP_FAT                  | GO:0030030~cell projection organization                   | $1.4 \times 10^{-2}$ | 0.68             |

**Supplementary Table 8:** Functional annotation clusters for 5-hmC enriched brain genes (DAVID). Each cluster represents a group of genes with significant overlap in annotation terms. The Enrichment Score of a cluster is the geometric mean of the exponents of the *P*-values associated with all the member terms in a cluster. The low *P*-values of individual GO terms are a trade-off for identifying clusters where genes had greater overlap in annotation terms (DAVID classification stringency = “High”). Using the default setting would have identified clusters with higher enrichment scores but lower overlap.

**Supplementary Table 9:** Genes enriched for 5-hmC in mouse brain, which also have steady-state mRNA levels enriched in particular cell types within brain tissue. The list of genes with statistically enriched steady-state mRNA levels was obtained from <sup>1</sup>. Genes with fold-enrichment > 5.0 were considered enriched in particular cell types.

| <b>Astrocyte-enriched</b> | <b>Neuron-enriched</b> | <b>Oligodendrocyte-enriched</b> |
|---------------------------|------------------------|---------------------------------|
| Bcl2                      | 2010300C02Rik          | Ank3                            |
| Bmper                     | Arhgap20               | Ccnyl1                          |
| Ednrb                     | Arpp21                 | Cnksr3                          |
| Elov12                    | Atp2b1                 | Cpm                             |
| Eya4                      | Btbd11                 | Dock10                          |
| Fgd6                      | Cacna1e                | Elov17                          |
| Gli3                      | Cacna2d3               | Jam3                            |
| Glis3                     | Cadps                  | Nfasc                           |
| Gpam                      | Clstn2                 | Opcml                           |
| Gpc5                      | Col19a1                | Pcdh9                           |
| Gpc6                      | Cpne4                  | Serinc5                         |
| Il17rd                    | Dnm3                   | Slc45a3                         |
| Mamdc2                    | Dpp10                  | St18                            |
| Nhs11                     | Erc2                   | Tmcc2                           |
| Nr2e1                     | Fgf14                  | Tmeff2                          |
| Ntrk2                     | Gfra2                  | Tmem108                         |
| Peli2                     | Gng2                   | Tmem163                         |
| Rfx4                      | Gpr39                  | Tmem182                         |
| Rnf182                    | Grem2                  | Unc5b                           |
| Slc41a1                   | Gria4                  | Ust                             |
| Sorbs1                    | Grip1                  | Zfp365                          |
| Tcfcp211                  | Hcn1                   |                                 |
| Tgfb2                     | Hecw1                  |                                 |
| Tnfrsf19                  | Hivep2                 |                                 |
| Tph2                      | Hs3st5                 |                                 |
|                           | Kcnc2                  |                                 |
|                           | Kcnh1                  |                                 |
|                           | Kenma1                 |                                 |
|                           | Kcnt2                  |                                 |
|                           | Lin7a                  |                                 |
|                           | Lingo1                 |                                 |
|                           | Mctpl                  |                                 |
|                           | Nav3                   |                                 |
|                           | Nrg3                   |                                 |
|                           | Ntrk2                  |                                 |
|                           | Nts                    |                                 |
|                           | Pfkip                  |                                 |



Pkib  
Ppfia2  
Ptk2b  
Ptprk  
Rab3c  
Rgs17  
Rgs7bp  
Rgs8  
Rims1  
Ryr2  
Slc35f4  
Slc6a15  
Slco5a1  
Spock1  
Ssbp2  
Stau2  
Syne1  
Synpr  
Syt1  
Trhde

---

|                                                      | <b>Brain, BA10<br/>(Control)</b> | <b>Brain, BA10<br/>(Bipolar)</b> | <b>Brain, BA10<br/>(Schizophrenia)</b> | <b>Liver</b>       |
|------------------------------------------------------|----------------------------------|----------------------------------|----------------------------------------|--------------------|
| Number of Samples                                    | 28                               | 28                               | 30                                     | 13                 |
| Mean Age in years (range)                            | 49<br>(32 – 80)                  | 49<br>(29 – 75.5)                | 49.5<br>(24 – 75.5)                    | 54.31<br>(31 – 75) |
| Sex                                                  |                                  |                                  |                                        |                    |
| Male                                                 | 13                               | 15                               | 15                                     | 6                  |
| Female                                               | 15                               | 13                               | 15                                     | 7                  |
| <i>Post Mortem</i> Interval in<br>hours, (std. dev.) | 30<br>(12.4)                     | 32.6<br>(19.9)                   | 32.4<br>(15.6)                         | 5<br>(2.2)         |

**Supplementary Table 10:** Demographic information for human samples.

| Biological context                              | 5-hydroxymethylcytosine<br>(5-hmC) |                  |                  |                    |               |                        | 5-methylcytosine<br>(5-mC) |               |                        |
|-------------------------------------------------|------------------------------------|------------------|------------------|--------------------|---------------|------------------------|----------------------------|---------------|------------------------|
|                                                 | $n^1$                              | # E <sup>2</sup> | # I <sup>2</sup> | E - I <sup>3</sup> | 95%CI         | $P^4$                  | E - I <sup>3</sup>         | 95%CI         | $P^4$                  |
| <b>d = 5 bp from exon-intron boundary</b>       |                                    |                  |                  |                    |               |                        |                            |               |                        |
| <b>Human</b>                                    |                                    |                  |                  |                    |               |                        |                            |               |                        |
| Brain BA10, Controls                            | 28                                 | 762              | 43               | 0.12               | [0.07, 0.16]  | $5.7 \times 10^{-8}$   | -0.01                      | [-.06, 0.04]  | 0.85                   |
| Brain BA10, Psychosis                           | 54                                 | 239              | 26               | 0.11               | [0.06, 0.14]  | $6.8 \times 10^{-9}$   | - 0.01                     | [-0.05, 0.05] | 0.06                   |
| Brain BA10, Controls (exp2)                     | 12                                 | 339              | 26               | 0.06               | [-0.04, 0.17] | $1.4 \times 10^{-2}$   | 0.13                       | [0.05, 0.24]  | $2.60 \times 10^{-4}$  |
| Liver (exp2)                                    | 13                                 | 339              | 26               | 0.02               | [-0.05, 0.12] | 0.30                   | 0.16                       | [0.09, 0.26]  | $4.80 \times 10^{-6}$  |
| <b>Mouse</b>                                    |                                    |                  |                  |                    |               |                        |                            |               |                        |
| Frontal cortex                                  | 15                                 | 393              | 11               | 0.00               | [-0.12, 0.18] | 0.35                   | 0.22                       | [0.14, 0.34]  | $9.20 \times 10^{-4}$  |
| Rest of the brain                               | 15                                 | 393              | 11               | 0.05               | [-0.07, 0.22] | 0.60                   | 0.11                       | [-0.04, 0.10] | $6.40 \times 10^{-2}$  |
| Liver, Pancreas, Heart, Kidney                  | 24                                 | 504              | 15               | -0.01              | [-0.13, 0.08] | 0.25                   | 0.11                       | [0.04, 0.24]  | $3.10 \times 10^{-2}$  |
| Neuronal cell line (mouse)                      | 18                                 | 285              | 10               | 0.07               | [-0.04, 0.21] | 0.72                   | 0.12                       | [-0.05, 0.28] | $2.80 \times 10^{-2}$  |
| <b>B-lymphocyte cell line (human)</b>           |                                    |                  |                  |                    |               |                        |                            |               |                        |
| Vehicle- treated (0 $\mu$ M SAHA)               | 6                                  | 400              | 13               | -0.03              | [-0.11, 0.06] | 0.95                   | 0.21                       | [0.02, 0.45]  | 0.40                   |
| 1/10 <sup>th</sup> of IC-10 (0.01 $\mu$ M SAHA) | 6                                  | 400              | 13               | 0.07               | [-0.13, 0.24] | 0.35                   | 0.10                       | [0.02, 0.45]  | 0.27                   |
| 1/5 <sup>th</sup> of IC-10 (0.02 $\mu$ M SAHA)  | 6                                  | 400              | 13               | 0.09               | [-0.11, 0.20] | 0.97                   | 0.05                       | [-0.26, 0.24] | 0.95                   |
| IC-10 (0.10 $\mu$ M SAHA)                       | 6                                  | 400              | 13               | -0.07              | [-0.26, 0.08] | 0.44                   | 0.06                       | [-0.27, 0.26] | 0.84                   |
| <b>d= 20 bp from exon-intron boundary</b>       |                                    |                  |                  |                    |               |                        |                            |               |                        |
| <b>Human</b>                                    |                                    |                  |                  |                    |               |                        |                            |               |                        |
| Brain BA10, Controls                            | 28                                 | 2,445            | 811              | 0.05               | [0.04, 0.06]  | $4.30 \times 10^{-23}$ | 0.02                       | [0.01, 0.03]  | $1.70 \times 10^{-4}$  |
| Brain BA10, Psychosis                           | 54                                 | 1,148            | 424              | 0.04               | [0.03, 0.06]  | $9.20 \times 10^{-20}$ | 0.01                       | [0.00, 0.03]  | $2.60 \times 10^{-2}$  |
| Brain BA10, Controls (exp2)                     | 12                                 | 1,148            | 424              | 0.07               | [0.05, 0.08]  | $1.50 \times 10^{-12}$ | 0.05                       | [0.03, 0.07]  | $4.60 \times 10^{-10}$ |
| Liver (exp2)                                    | 13                                 | 1,148            | 424              | 0.01               | [-0.01, 0.03] | $3.10 \times 10^{-2}$  | 0.05                       | [0.03, 0.07]  | $4.80 \times 10^{-12}$ |
| <b>Mouse</b>                                    |                                    |                  |                  |                    |               |                        |                            |               |                        |
| Frontal cortex                                  | 15                                 | 1,244            | 309              | 0.06               | [0.04, 0.09]  | $7.50 \times 10^{-6}$  | -0.01                      | [-0.03, 0.01] | 0.84                   |
| Rest of the brain                               | 15                                 | 1,244            | 309              | 0.06               | [0.04, 0.09]  | $3.00 \times 10^{-8}$  | 0.01                       | [-0.02, 0.04] | 0.33                   |
| Liver, Pancreas, Heart, Kidney                  | 24                                 | 1,613            | 422              | 0.03               | [0.01, 0.04]  | $5.70 \times 10^{-3}$  | 0.08                       | [ 0.06, 0.10] | $3.40 \times 10^{-19}$ |

|                                                 |    |       |     |      |               |                       |      |              |                        |
|-------------------------------------------------|----|-------|-----|------|---------------|-----------------------|------|--------------|------------------------|
| <b>Neuronal cell line (mouse)</b>               | 18 | 857   | 203 | 0.03 | [-0.00, 0.06] | $4.50 \times 10^{-2}$ | 0.13 | [0.10, 0.17] | $1.60 \times 10^{-17}$ |
| <b>B-lymphocyte cell line (human)</b>           |    |       |     |      |               |                       |      |              |                        |
| Vehicle- treated (0 $\mu$ M SAHA)               | 6  | 1,301 | 418 | 0.02 | [-0.01, 0.05] | 0.275                 | 0.08 | [0.01, 0.12] | $2.70 \times 10^{-5}$  |
| 1/10 <sup>th</sup> of IC-10 (0.01 $\mu$ M SAHA) | 6  | 1,301 | 418 | 0.06 | [-0.01, 0.08] | 0.0144                | 0.09 | [0.05, 0.15] | $6.10 \times 10^{-8}$  |
| 1/5 <sup>th</sup> of IC-10 (0.02 $\mu$ M SAHA)  | 6  | 1,301 | 418 | 0.05 | [0.02, 0.10]  | $8.8 \times 10^{-4}$  | 0.05 | [0.02, 0.11] | $4.00 \times 10^{-2}$  |
| IC-10 (0.10 $\mu$ M SAHA)                       | 6  | 1,301 | 418 | 0.05 | [0.02, 0.09]  | $3.6 \times 10^{-4}$  | 0.06 | [0.00, 0.09] | $7.20 \times 10^{-4}$  |

<sup>1</sup> Number of biological samples; <sup>2</sup> Number of measurements for boundary side = (# probes \* n); <sup>3</sup> Median increase in exons, relative to introns (value > 0 indicate higher exonic levels); <sup>4</sup> P-values from linear mixed-effects model (Online Methods)

**Supplementary Table 11:** Statistics on DNA modification changes at cumulative distances (d = 5 and d = 20) from the exon-intron boundary.

|                                  | Num. arrays | probes per array | 5-hmC + 5-mC |      | 5-hmC  |      | 5-mC   |      |
|----------------------------------|-------------|------------------|--------------|------|--------|------|--------|------|
|                                  |             |                  | Median       | IQR  | Median | IQR  | Median | IQR  |
| <b>Human</b>                     |             |                  |              |      |        |      |        |      |
| <i>Controls</i>                  | 56          | 136,477          | 0.26         | 1.02 | 0.11   | 0.99 | 0.14   | 0.97 |
| <i>Psychosis</i>                 | 54          | 69,252           | 0.34         | 1.00 | 0.11   | 1.01 | 0.23   | 0.97 |
| <i>Exp2, Brain</i>               | 12          | 69,252           | 0.45         | 0.97 | 0.23   | 0.86 | 0.23   | 0.81 |
| <i>Exp2, Liver</i>               | 13          | 69,252           | 0.40         | 0.98 | 0.04   | 0.84 | 0.37   | 0.90 |
| <b>Mouse</b>                     |             |                  |              |      |        |      |        |      |
| <i>Frontal cortex</i>            | 15          | 69,052           | 0.56         | 1.02 | 0.19   | 0.91 | 0.37   | 0.90 |
| <i>Brain, non-frontal cortex</i> | 15          | 69,052           | 0.59         | 1.02 | 0.18   | 0.90 | 0.41   | 0.93 |
| <i>Non-brain organs</i>          | 36          | 130,314          | 0.57         | 1.10 | 0.05   | 0.89 | 0.51   | 1.05 |
| <b>Cell lines</b>                |             |                  |              |      |        |      |        |      |
| <i>Human B-lymphocyte</i>        | 24          | 76,102           | 0.36         | 0.99 | -0.07  | 0.88 | 0.44   | 0.98 |
| <i>Mouse neuronal</i>            | 18          | 46,892           | 0.47         | 1.05 | 0.02   | 0.93 | 0.47   | 1.06 |

**Supplementary Table 12:** Median probe intensities for DNA modifications for all datasets used in the exon-intron boundary analysis. Probes were pooled across all samples and arrays without aggregation before median and interquartile range (IQR) were computed. Consistent with previous literature, 5-hmC intensities are higher in tissues sampled from the brain, relative to those sampled from other tissues (e.g. human liver, mouse non-brain organs). Negligible 5-hmC was detected in the two cell lines tested.

|                    | Channel         | Aligned   | Target (T) | Non-target (NT) | (T / ( T+NT)) * 100 |
|--------------------|-----------------|-----------|------------|-----------------|---------------------|
| <b>Replicate 1</b> | Undigested      | 408,987   | 1,341      | 276,142         | 0.5                 |
|                    | gDNA (MspI)     | 2,761,844 | 1,083,483  | 662,416         | 62.1                |
|                    | gDNA (HpaII)    | 1,407,105 | 444,298    | 511,772         | 46.5                |
|                    | glc-gDNA (MspI) | 1,231,589 | 421,646    | 356,355         | 54.2                |
| <b>Replicate 2</b> | Undigested      | 1,301,480 | 4,766      | 850,546         | 0.6                 |
|                    | gDNA (MspI)     | 2,224,007 | 829,158    | 593,030         | 58.3                |
|                    | gDNA (HpaII)    | 2,840,191 | 918,979    | 1,004,470       | 47.8                |
|                    | glc-gDNA (MspI) | 3,166,749 | 1,185,353  | 833,898         | 58.7                |
| <b>Replicate 3</b> | Undigested      | 2,395,206 | 5,758      | 1,663,120       | 0.3                 |
|                    | gDNA (MspI)     | 2,166,860 | 646,267    | 620,031         | 51.0                |
|                    | gDNA (HpaII)    | 2,115,006 | 662,905    | 534,374         | 55.4                |
|                    | glc-gDNA (MspI) | 1,487,507 | 374,791    | 469,684         | 44.4                |

**Supplementary Table 13:** Read counts from Helicos single-molecule sequencing. Target reads are reads where the 5' end lies within  $\pm 3$ bp of a CCGG site. Non-target reads are reads where the 5' end lies outside  $\pm 200$ bp of a CCGG site.

|                             | Brain (six chromosomes) |                   | Liver (three chromosomes) |                   |
|-----------------------------|-------------------------|-------------------|---------------------------|-------------------|
|                             | Constitutive exons      | Alternative exons | Constitutive exons        | Alternative exons |
| # exons on array chroms     | 5,862                   | 980               | 1,048                     | 118               |
| <i>Whole exon</i>           |                         |                   |                           |                   |
| exons with probes           | 1,010                   | 95                | 177                       | 15                |
| probes                      | 1,234                   | 199               | 224                       | 18                |
| <i>d ≤ 20 from boundary</i> |                         |                   |                           |                   |
| exons with probes           | 349                     | 30                | 71                        | 4                 |
| probes                      | 358                     | 31                | 73                        | 4                 |

**Supplementary Table 14:** Exonic probe count of RNAseq data from human liver and brain (cortex). RNAseq data was obtained from Brawand *et al.*, 2011 <sup>2</sup>

---

| <b>Adaptor end</b> | <b>Adaptor sequence (5'-3')</b>         |
|--------------------|-----------------------------------------|
| A1                 | 5' AGT TAC ATC TTG TAG TCA GTC TCC A 3' |
| A25                | 5' TGG AGA CTG ACT ACA AGA T 3'         |

**Supplementary Table 15:** Adaptor primer sequence for blunt-ended adaptors ligated to sheared genomic DNA. Adaptors are prepared by mixing equal molar amounts (100  $\mu$ M) of complementary primers annealed in 10 mM TrisHCl (pH 8.0), heating at 95  $^{\circ}$ C for 5 minutes followed by slow cooling (1  $^{\circ}$ C/minute) to room temperature.



## ***Supplementary Note 1***

### **Production of a 31-mer DNA duplex containing modified cytosines at a CCGG target site**

Equal molar amounts (150 $\mu$ M) of complementary single-stranded oligonucleotides (5'-tgaccacgctcgcc and 3'-actgggtgcgagcgggcctctatttaataca) were annealed in water by heating at 95°C for 5 minutes, followed by slow cooling to room temperature. Annealed DNA (5  $\mu$ M) was supplemented with dGTP, dTTP, dATP and dCTP, dmCTP or dhmCTP (Bioline, USA) (1mM each) and Klenow Fragment (0.15 U /  $\mu$ l, Fermentas), and incubated in Klenow reaction buffer at 37°C for 40 minutes to produce duplexes containing cytosine (C), 5-mC or 5-hmC at the target site, respectively. 1  $\mu$ M of duplex oligo with 5-hmC, 200  $\mu$ M UDP-Glc (Sigma) and 0.04  $\mu$ g BGT were incubated for 1.5 hrs at 37°C in buffer (15  $\mu$ l, 100 mM Tris-HCl pH 8.0, 25 mM magnesium chloride). Then, 2  $\mu$ l of Tango buffer, 1  $\mu$ l (10 U) of MspI (Fermentas) and 2  $\mu$ l of water was added to the reaction, and incubation was continued for 1.5 hrs. Samples were supplemented with 1/6 of 6x Loading Dye Solution and analyzed by 15% polyacrylamide gel electrophoresis.

### **Thin-layer chromatography quantification of total genomic 5-mC, 5-hmC and C at CCGG sites**

Genomic DNA (40 ng) was digested with MspI (Fermentas) endonuclease for 2 hrs at 37°C and dephosphorylated with 0.1 U of FastAp (Fermentas) for 1 h at 37°C. Enzymes were inactivated by heating at 75°C for 10 minutes. 5'-end-labelling of DNA fragments was carried out with 4 U T4 Polynucleotide Kinase (Fermentas) in the presence of 3.3  $\mu$ Ci of [ $\gamma$  33-P]-ATP (Hartmann Analytic) at 37°C for 10 minutes in T4 Polynucleotide Kinase reaction buffer, followed by enzyme inactivation at 90°C for 3 minutes. Labelled fragments were ethanol-precipitated using sodium acetate pH 7.0 (3 M) as part of a standard protocol. Air-dried pellets were dissolved in 4  $\mu$ L Lambda Exonuclease buffer and incubated with 2.5 U Lambda Exonuclease at 37°C for 2 hours (Fermentas). Aliquots of hydrolysate (3 replicates) were spotted on PEI cellulose plates (PEI Cellulose F, 20 x 20 cm, Merck) and chromatographed by eluting with isobutyric acid/water/conc. ammonia (66:17:4, vol/vol/vol). Plates were dried, autoradiographed to phosphorimager screens and analyzed with a FLA-5100 scanner and MultiGauge software (Fujifilm). Ratios of C, 5-mC and 5-hmC were calculated after subtracting corresponding gel density values from control experiments. Note that methylation of repetitive elements was quantified by TLC, while repeat-overlapping probes were excluded from the microarray data analysis; this difference could partially account for the discrepancy between these two methods.

### **Quantitative Polymerase Chain Reaction**

BGT-treated and -untreated DNA was subjected to MspI digestion. In addition, DNA was digested by HpaII and an undigested control was used (Online Methods). Locus-specific real-time PCR was performed using 10 ng genomic DNA and SYBR® Green PCR Master Mix (Applied Biosystems) on the 7500 Real-Time PCR System (Applied Biosystems), according to the manufacturer's recommendations (melting temperature of 60°C). Primer sequences and genomic coordinates

(UCSC genome build *hg18*) tested for qPCR are listed in Supplementary Table 3. Each sample was performed in duplicate and the corresponding *Ct* values were obtained from the 7500 System SDS Software v1.3.1 (Applied Biosystems). All primer pairs flanked either one or two MspI target sites (CCGG) (target primer pairs). One primer pair did not flank an MspI target site and was used as an internal control (reference primer pair, *ref*). The efficiency (*E*) of each primer pair was calculated from the slope of regression line obtained by plotting *Ct* values against varying DNA concentration<sup>3</sup>.  $\Delta Ct$  and percent modification values were calculated from the formula:

$$\Delta Ct = Ct_{meanUndigested} - Ct_{meanDigested}$$

$$\% \text{ modification} = \frac{(E_{target})^{\Delta Ct(target)}}{(E_{ref})^{\Delta Ct(ref)}} \times 100$$

### **Adaptor PCR amplification for Affymetrix tiling arrays**

Restriction enzyme-digested DNA fragments were amplified with an adaptor primer (5'-agttacatctgtagtcagctcca-3'), and dUTP was included in the dNTP mix as specified by Affymetrix. Two rounds of PCR amplifications were performed to achieve the required DNA amount for tiling array hybridization. PCR cycling for the 1<sup>st</sup> round of amplification was performed on the restriction enzyme-digested gDNA sample. The second round of amplification was done on 1/10<sup>th</sup> of the 1<sup>st</sup> PCR template; both rounds of amplification used the same PCR cycling conditions (i.e. 95°C for 1 minute, followed by 15 cycles of 94°C for 15 seconds, 65°C for 30 seconds and 1 minute at 72°C, with an extension of 5 second in each subsequent cycle). The amplicons were then purified using QIAquick 96 PCR Purification Kit (Qiagen) and checked for quality and quantity on a NanoDrop 2000 spectrophotometer (Thermo Scientific). Nine micrograms of PCR amplicons were fragmented to 50–100 bp using uracil DNA glucosylase enzyme, which cleaves DNA at incorporated dUTP (GeneChip® WT Double-Stranded DNA Terminal LabelingKit, Affymetrix). Fragments were end-labeled according to the manufacturer's instructions. Prior to labelling, 1  $\mu$ L of fragmented DNA was analyzed on a Bioanalyzer using the DNA1000Chip (Agilent Technologies) to check the uniformity of the fragmented products. Individual samples were hybridized on a separate Gene Chip of Human or Mouse Tiling 2.0R array for 16 hrs at 45°C.

### **Selection of array normalization algorithm**

We first investigated various methods of array preprocessing to identify the algorithm best suited to analyze DNA modification data on tiling arrays. We considered quantile normalization and two variants of probe-sequence based normalization. Quantile normalization, a conventional choice, results in every microarray having the same overall intensity distribution, an assumption that may be invalid in cases where microarrays represent different tissues and interrogate modifications that may vary several-fold in magnitude among them<sup>4</sup> (e.g. 5-hmC is higher in brain than in other tissues<sup>5-7</sup>). Moreover, it does not explicitly correct for probe sequence-based affinity bias, a known issue in tiling arrays<sup>8</sup>. We considered MAT (model-based analysis of tiling arrays,<sup>9</sup>) and an alternative

sequence-based normalization scheme with fewer parameters (the “Potter” algorithm; <sup>10</sup>). We then correlated single-probe intensities normalized using each algorithm with 11 arbitrary loci on which we performed quantitative PCR. The Potter algorithm showed the highest correlation with qPCR estimates (Supplementary Table 2), so we chose this algorithm. We also determined that fitting the sequence-based model (equation 1 in Supplementary Note 1) to non-target probes with the same GC-composition as the target-probes, rather than to all non-target probes, resulted in a more uniform baseline for the non-target probes (not shown, for definition of target and non-target probes, see Online Methods).

It was originally unclear if targets analyzed at the single-probe level had a smaller measurement bias than those analyzed by averaging probe intensities in a window surrounding the target. We therefore correlated digestion efficacies from qPCR experiments with microarray intensities measured at the single-probe level, and using rectangular or distance-weighted windows (Supplementary Table 2). Both types of windows were tested at longer (~340 bp, microarray amplicon size) and shorter (~100 bp, average size of qPCR amplicon) lengths. Single-probe intensities showed the strongest correlation with qPCR estimates (Supplementary Table 2, Supplementary Fig. 2a). Windowed probe averages in glucosylated samples had dramatically lower correlations with qPCR estimates, relative to single probe measurements (Correlations: Single probe = 0.52, 100 bp rectangular window = 0.03, 100 bp distance-weighted window = 0.17). We concluded that single-probe estimates provided the best balance between bias and precision for these data, and analyzed our data at the single probe level.

### Array normalization

Non-target probes were first trimmed to proportionally match target probes in GC content. The probe sequence-based affinity model (equation (1), the “Potter” model) was applied to non-target probes. The fitted value was subtracted from raw intensities of all probes, resulting in normally-distributed probe-level intensities. In equation (1),  $\alpha$  corrects for baseline chip-level intensity differences,  $\beta$  represents the total number of each nucleotide,  $\gamma$  and  $\theta$  for position of each nucleotide. Each chip was individually normalized. All downstream analyses were carried out at the single-probe level (i.e. without windowing or peak-calling) and exclusively on target probes (henceforth referred to simply as ‘probes’).

$$\hat{y} = \alpha + \sum_{j \in \{A,C,G,T\}} \beta_j n_j + \sum_{j \in \{A,C,G\}} \gamma_j \sum_{k=1}^{25} I(b_k = j) + \sum_{j \in \{A,C,G\}} \theta_j \left( \sum_{k=1}^{25} I(b_k = j) \right)^2 \quad (1)$$

Values for various DNA modifications were generated by computing the log-ratios of base channels of a given biological sample (restriction enzyme treatments are indicated by corresponding names in parenthesis; all values are log<sub>2</sub>-transformed):

$$5hmC = \log_2(gDNA_{glu}(MspI)) - \log_2(gDNA_{ref}(MspI)) \quad (2)$$

$$5mC = \log_2(gDNA_{ref}(HpaII)) - \log_2(gDNA_{glu}(MspI)) \quad (3)$$

$$5hmC + 5mC = \log_2(gDNA_{ref}(HpaII)) - \log_2(gDNA_{ref}(MspI)) \quad (4)$$

### Identification of differentially enriched 5-hmC intergenic regions in the mouse brain

We identified differential 5-hmC in intergenic regions using probe-wise linear regression. Intergenic probes were defined as probes which did not overlap any RefSeq genes on either strand; 60,721 probes met this criterion. A probe-wise linear regression was conducted, with the regressor being an indicator variable of tissue type 'Brain' or 'Other' (*lmFit* from the R package *limma*). The fit was first moderated using Empirical Bayes shrinkage (eBayes), and nominal p-values were adjusted using Benjamini-Hochberg FDR. Eighty-three probes had *Q*-values < 5 % and were called 'differential'. All 83 probes were enriched in the brain, relative to other tissues.

### Functional annotation analysis of 5-hmC rich genes

Gene Ontology (GO) overrepresentation analysis (ORA) was done using DAVID (Database for Annotation, Visualization and Integrated Discovery<sup>11</sup>); for the background gene set, we used the 5,925 RefSeq IDs associated with the 4,357 genes (defined by MGI symbols) for which tests were performed. The foreground consisted of genes (MGI symbols) identified as enriched based on gene-wise tests. GO-related databases (GOTERM\_CC\_FAT, GOTERM\_BP\_FAT, and GOTERM\_MF\_FAT) were chosen for annotation databases.

DAVID also identifies 'clusters of annotation terms' with member genes that share annotation terms more than expected by chance. In part, this aggregation serves to combine individual terms into groups potentially representing biological pathways. The 'Classification Stringency' parameter was set to "High" (Default = "Medium") to create smaller clusters with greater overlaps in annotation terms. The Enrichment Score (ES) of an annotation cluster is the geometric mean of the exponents of *P*-values associated with individual member annotation terms in the cluster<sup>11</sup>.

### Categorization of genes by brain cell type

The list of genes with cell-type specific enrichment scores was downloaded from the Supplementary Online Material accompanying a dataset of steady-state mRNA levels in FACS-sorted brain cell populations<sup>1</sup>. Genes with relative mRNA enrichment > 5.0 were called as being enriched in a particular cell-type. Genes with > 20.0 enrichment were deemed to be cell-type specific (after analyses and threshold set in the source paper).

## Analysis of genes with particular GO terms, for mouse and human brain

The list of all mouse (or human) genes mapped to specific GO terms was downloaded from the AmiGO Gene Ontology browser (release date 2011-05-07, AmiGO version 1.8, download date 2011-05-13 (mouse), 2011-05-15 (human)). Gene association files were downloaded for GO:0045202 (“synapse”), GO:0044456 (“synapse part”), GO:0007155 (“cell adhesion”), and GO:0005886 (“plasma membrane”) (filter for species *Mus musculus* (or *Homo sapiens*); GO evidence codes not filtered). Genic probes were defined as those that overlapped RefSeq genes on at least one strand (*refGene* table from UCSC genome browser, *hg18* for human, *mm8* for mouse). Genes on interrogated tiling arrays were divided into those that were mapped to the GO term being analyzed, and those that were not. Within each group of genes, individual probes were first averaged (mean) across samples in the tissue group (e.g. brain). Probes were not averaged across a gene. GC content of each probe was obtained using the probe sequence provided in the Affymetrix array annotation (bpmmap) file.

## Calculation of exon-intron boundary differential

A linear mixed-effects model<sup>12</sup> was used to test probe intensity differences between the exonic and intronic side of the junction, using junction side (*junctionSide*='Exon' or 'Intron') as the fixed-effects term, and sample (*Sample* in eqn 5,6) as random-effects terms (*lmer4* package in R). For datasets that used multiple array types, array type (*Array* in eqn. 5,6) was used as an additional random-effects term.

ANOVA was used to determine whether the data better fit the null model:

$$Intensity = 1 + (Array + Sample) + residual \quad (5)$$

or the alternative model, which took into account the side of the junction on which the probe occurred (*junctionSide*):

$$Intensity = 1 + junctionSide + (Array + Sample) + residual \quad (6)$$

Tests with *P*-value < 0.025 were deemed significant.

The Wilcoxon-Mann-Whitney test (WMW test), a more common choice for testing difference in medians, would have been an inappropriate choice to compare exonic and intronic intensities. Our data contained multiple measurements per sample, violating the assumption of independence required by the WMW.

## Relating DNA modifications to mRNA levels with transcriptomic data

We used a previously-published dataset (GSE10246<sup>13</sup>) that measured steady-state mRNA levels in a variety of adult mouse tissues. Normalized expression values were downloaded in series matrix format from the Gene Expression Omnibus<sup>14</sup>, and analyzed in R using the BioConductor package GEOquery<sup>15</sup>. Array annotation was downloaded from Bioconductor (“mouse4302.db”). Probes were averaged across samples within a tissue, and then averaged within RefSeq IDs.

The transcriptomic dataset was validated prior to use. Samples were subjected to unsupervised hierarchical clustering (distance = Pearson's correlation, clustering method = "ward"), and the cluster heatmap was manually examined to establish that tissues with similar developmental origin were grouped into closer subtrees than tissues from different cellular lineages (heatmap visualization done in Seurat<sup>16</sup>). Further spot checks were done for individual genes with a known characteristic expression pattern (e.g. *Nanog*, a transcription factor expressed in embryonic stem cells, is expected to be relatively overexpressed in ES cell lines and underexpressed in differentiated tissues). RNA samples were separated into brain ("cerebral\_cortex\_prefrontal", "cerebral\_cortex", or "cerebellum",  $n = 6$  arrays), liver, heart, kidney and pancreas (2 arrays each). For each tissue, genes (RefSeq IDs) were stratified into deciles, based on mRNA level.

Separately, in our dataset of DNA modification estimates, samples were grouped by tissue (brain = 11; liver, kidney, heart, pancreas = 9 arrays each). For each tissue, probes were first averaged across samples and then within a gene, resulting in one value per RefSeq ID. Genes were binned according to their mRNA expression decile (previous paragraph), and the average quantity of 5-mC or 5-hmC in each decile was computed.

### **Helicos single molecule sequencing (SMS) and analysis**

Micrococcus nuclease digestion was used to fragment genomic DNA to a median size of 500 bp and to reduce 3' hydroxyl end at the DNA fragments, where the latter served as the starting end for SMS. 5 µg of genomic DNA was treated with 1 U of micrococcal nuclease enzyme (NEB) and the reaction was stopped by adding 10 µl of 0.5M EDTA (in excess) in a time series. A small aliquot was then checked on 1% agarose gel and samples with median fragment size of 500 bp were column purified with buffer PN (QIAquick Nucleotide Removal Kit columns, Qiagen). Glucosylation and control treatments were performed as described before (Online Methods), and 200ng of each glucosylated or non-glucosylated treated DNA was subjected to 10 U of restriction enzyme digestions respectively at 37 °C for 8h, and inactivated at 80°C for 20 minutes.

10 ng of each digested product, quantified by Quant-iT™ PicoGreen dsDNA Reagent Kit (Invitrogen), was then processed for Helicos sequencing. In brief, 10ng of DNA was heat denatured at 95°C for 5 minutes prior to 3' end labeling with 5 U of terminal transferase (NEB) in presence of 200 µmoles of dATP (Roche) and 5 mmoles of CoCl<sub>2</sub> (NEB) in 20 µl reaction volume at 37°C for 1 h, and then inactivated at 70°C for 10 minutes. Fragments were biotinylated by repeating the terminal transferase enzymatic reaction step in the presence of 100 µmoles of biotin labeled ddATP (Perkin Elmer) instead of dATP in a reaction volume of 30 µl. These processed samples were then sent to the Helicos sequencing service facility ([www.helicosbio.com](http://www.helicosbio.com); USA).

Three technical replicates of the same human brain DNA sample were processed for glucosylation and respective restriction digestion with MspI enzyme with or without glucosylation treatment, and

with HpaII enzyme on non-glucosylated gDNA. Data from all three runs were pooled for analysis, after each run had been separately normalized using the corresponding number of non-target reads (see below). SMS reads were trimmed for leading “T” homopolymers, filtered for reads with a minimal length of 25 bases after trimming as well as for other standard Helicos quality metrics using a suite of Helicos tools available at: <http://open.helicosbio.com/mwiki/index.php/Releases>. Alignments to the *hg18* version of the human genome were conducted with indexDPgenomic software freely available on the Helicos website (<http://open.helicosbio.com/mwiki/index.php/Releases>). The sequence reads were aligned using a minimum normalized score of 4.3. Only uniquely-mapped reads were considered for the present analysis (Supplementary Table 13 for read counts).

Reads with a 5' coordinate  $\leq 3$  bp from a target sequence (CCGG) were defined as target reads. Reads with a 5' coordinate  $\geq 200$  bp away from a CCGG sequence were used to normalize the read count. Junction distance of target reads were computed as for the microarray analysis, using the coordinate of modifiable cytosine (underlined “C” in “CCCGG”) of the read-associated target site. Raw reads were first aggregated by junction distance (e.g. distance to exon start/end or intron start/end) respectively for both channels (unglucosylated or glucosylated DNA samples). Aggregated reads were normalized by non-target read count and scaled relative to the number of reads in the channel with non-glucosylated DNA. Percent 5-hmC was computed as the fold-difference in reads from the glucosylated channel, relative to those in the non-glucosylated channel. The proportion of reads arising from CCGG target sequences was greater in the non-glucosylated DNA sample, compared to the glucosylated DNA sample. This is expected since higher levels of digestion will generate more DNA fragments with 3' hydroxyl ends, a prerequisite for Helicos single molecule sequencing (Supplementary Table 13).

HpaII digestion resulted in more reads than expected from previous estimates of total DNA modification in the average mammalian cell. (Supplementary Table 13, <sup>17</sup>). One possibility is that the HpaII enzyme generates single strand nicks in the modified DNA, which remained undetected in earlier studies that estimated total DNA methylation within the genome; this observation requires further investigation. For this study, only MspI digestion was taken in account, as it has identical restriction conditions for glucosylated and for non-glucosylated DNA.

### **Identification of cassette exons for exon inclusion analysis**

To identify cassette exons, first, all available human expressed sequence tags (ESTs) and mRNA sequences were mapped to the human genome (*hg19*) using SIM4. The information on intron-exon structures was then merged with Ensembl annotation (release 65). From this database, a bowtie library of exon-exon junction (EEJ) sequences was generated by combining every possible splicing donor and acceptor within each gene. RNAseq from liver and cortex <sup>2</sup> was mapped to this library using bowtie with  $-m 1 -v 2$  parameters. Reads were trimmed to 50 nucleotides and reads mapping to the genome were previously discarded (since EEJs must not exist in the genome). A minimum of eight mapped nucleotides were required at each of the two exons in a given EEJ. The outputs were

then parsed to identify cassette exons (exons that are either included or fully excluded from the transcripts), by examining exons that have associated reads maps to (i) both EEJs, supporting the inclusion of the exon (constitutive upstream exon (C1)-cassette exon (A) or A-constitutive downstream exon (C2)) and (ii) the EEJ for the exclusion of the exon (C1-C2). Genome coordinates were converted to build *hg18* (liftOver, UCSC genome browser) prior to the analysis with DNA modification arrays.

### **Treatment of suberoylanilide hydroxamic acid (SAHA) on human B-lymphocyte cells**

Transformed human B-lymphocyte cells (GM10851, Coriell Cell Repositories) were treated with the histone deacetylase inhibitor SAHA. Prior to the experiment, a cell viability assay (ATP luminescence assay; Cell Titer-Glo; Promega) for SAHA was conducted by titrating different SAHA concentrations. The maximum concentration of SAHA that induced minimal cytotoxicity (e.g., not more than a 10 % decrease in ATP levels on the cytotoxicity concentration response curve) is referred to as IC10 (0.1  $\mu$ M), while the other concentrations used were 1/5th (0.02  $\mu$ M) and 1/10th (0.01  $\mu$ M) of the maximum concentration. SAHA concentrations were dissolved in DMSO (Fisher Scientific). To assess the influence of SAHA on 5-hmC DNA modification, B-lymphocytes cells cultured at 37<sup>o</sup>C in 6-well plates were exposed to SAHA for 30 or 72 hrs. A comparable cell confluence was attained for each time point by plating  $1 \times 10^6$  cells in 4 mL of culture media (RPMI 1640 with 1 % l-glutamine (Invitrogen) supplemented with 15 % FCS (USDA tested (Hyclone)) for the 30 hrs time point and  $0.3 \times 10^6$  cells in 2.4 mL for the 72 hrs time point. For the 30 hrs time point cells, each of the 3 compound concentrations or vehicle (DMSO, with less than 0.4 % DMSO/well) were added at 5X in 1 mL culture media, while for the 72 hrs time point each of 3 compound concentrations or vehicle were initially added at 5X in 0.6 mL culture media and then at 24 and 48 hrs time points, 1X compound concentration or vehicle in 1 mL media was added to each well. Triplicates were performed for each respective treatment and cells were harvested for gDNA extraction. Genomic DNA was isolated with phenol chloroform and isopropanol precipitation and glucosylation, restriction enzyme digestion and analysis on tiling microarray were performed as described before.



## ***Supplementary Note 2***

### **Verification of glucosyltransferase-based quantification of 5-hmC**

We performed three groups of control experiments to demonstrate the validity of using T4  $\beta$ -glucosyltransferase (BGT) to estimate the quantity of 5-hmC (Online Methods). First, glucosylation treatment was investigated on a 31-mer DNA duplex (see below) that contained 5-hmC modification (Supplementary Fig. 1a). Second, we determined the influence of the glucosylation treatment on unmethylated (C) and on methylated cytosines (5-mC). This was performed on whole genome PCR-amplified DNA that had lost all genomic modifications. The glucosylation and restriction digestion procedure was then applied to either whole-genome amplified (WGA, unmethylated genome) or SssI methyltransferase treated WGA DNA (fully methylated genome). Real time qPCR was used to estimate the % modifications (5-mC or 5-hmC) present at specific loci ( $n = 3$ ). These two control experiments showed that there is no influence of the glucosylation procedure on 5-mC or on unmethylated cytosines, and that it is specific for 5-hmC. As a third control, we evaluated the linearity of the measure of 5-hmC by employing the BGT-based procedure in a model system (Supplementary Fig. 1b). A 200 bp DNA fragment containing one MspI/HpaII site for qPCR analysis was generated by PCR from mouse genomic DNA with primers 5'-gcacctcggagattgtgggcaacatc<sup>hm</sup>cgg (IBA, Germany) and 5'-gcccatgtcgtctgtg (Metabion, Germany). Enzymatic BGT glucosylation of the PCR product was performed in the presence of UDP-G (Online Methods) and PCR products were subsequently subjected to MspI restriction hydrolysis for 16 hrs. Real-time PCR experiments were performed with a Rotor-Gene<sup>TM</sup>6000 real-time PCR system (Corbett Research) using Maxima<sup>TM</sup>SYBR Green qPCR Master Mix (Fermentas); 0.3 mM primers were used in each reaction in a final volume of 25  $\mu$ l. The amplification program was set as: 95°C for 10 minutes, 40 cycles for 15 s, 60°C for 1 minutes, and a melt curve analysis step at the end to check the specificity of the PCR product. Data were analyzed by Rotor-Gene<sup>TM</sup>6000 real-time PCR software.

### **Comparison of biological versus technical variability**

Genomic DNA from two human brain samples (Stanley Medical Research Institute (SMRI) <sup>18</sup> was used to create two sets of technical replicates. Each DNA sample was split six ways, and six technical replicates were generated for MspI-treated genomic DNA (MspI-gDNA). These technical replicates were compared to six biological replicates, using MspI-treated genomic DNA from six individual human brain samples (SMRI; samples randomly chosen in R from full set of 28 used in the study). DNA was hybridized onto Affymetrix 2.0R human whole-genome tiling arrays (Array E: chr 5,7,16), generating a total of 24 arrays. Arrays were normalized using the Potter algorithm (Supplementary Note 1) and target probes were extracted for chromosome 5 (27,546 probes). For each of the three sets (two technical replicate sets, and one set of biological replicates), we computed the sample range of individual probe intensities. The probe-wise range in technical replicates (presumably owing to technical variation) was subtracted from that in biological replicates (Supplementary Fig. 2b), and the shift in range was tested using a one-sample t-test ( $\alpha =$

## References

1. Cahoy, J.D. et al. A transcriptome database for astrocytes, neurons, and oligodendrocytes: a new resource for understanding brain development and function. *J Neurosci* **28**, 264-78 (2008).
2. Brawand, D. et al. The evolution of gene expression levels in mammalian organs. *Nature* **478**, 343-8 (2011).
3. Pfaffl, M. Real-time PCR. Vol. 63 (ed. MT, D.) 63--82 (Taylor and Francis Group, 2006).
4. Laird, P.W. Principles and challenges of genome-wide DNA methylation analysis. *Nat Rev Genet* **11**, 191-203 (2010).
5. Globisch, D. et al. Tissue distribution of 5-hydroxymethylcytosine and search for active demethylation intermediates. *PLoS One* **5**, e15367 (2010).
6. Kriaucionis, S. & Heintz, N. The nuclear DNA base 5-hydroxymethylcytosine is present in Purkinje neurons and the brain. *Science* **324**, 929--930 (2009).
7. Nestor, C.E. et al. Tissue-type is a major modifier of the 5-hydroxymethylcytosine content of human genes. *Genome Res* (2011).
8. Liu, X.S. Getting started in tiling microarray analysis. *PLoS Comput Biol* **3**, 1842-4 (2007).
9. Johnson, W.E. et al. Model-based analysis of tiling-arrays for ChIP-chip. *Proc Natl Acad Sci U S A* **103**, 12457--62 (2006).
10. Potter, D.P., Yan, P., Huang, T.H.M. & Lin, S. Probe signal correction for differential methylation hybridization experiments. *BMC Bioinformatics* **9**, 453 (2008).
11. Huang, D.W., Sherman, B.T. & Lempicki, R.A. Systematic and integrative analysis of large gene lists using DAVID bioinformatics resources. *Nat Protoc* **4**, 44--57 (2009).
12. Vittinghoff E., G.D.V., Shiboski S.C., McCulloch C.E. Regression Methods in Biostatistics. 253-290 (2005).
13. Lattin, J.E. et al. Expression analysis of G Protein-Coupled Receptors in mouse macrophages. *Immunome Res* **4**, 5 (2008).
14. Edgar, R., Domrachev, M. & Lash, A.E. Gene Expression Omnibus: NCBI gene expression and hybridization array data repository. *Nucleic Acids Res* **30**, 207-10 (2002).
15. Sean, D. & Meltzer, P.S. GEOquery: a bridge between the Gene Expression Omnibus (GEO) and BioConductor. *Bioinformatics* **23**, 1846--7 (2007).
16. Gribov, A. et al. SEURAT: visual analytics for the integrated analysis of microarray data. *BMC Med Genomics* **3**, 21 (2011).
17. Robertson, K.D. & Jones, P.A. DNA methylation: past, present and future directions. *Carcinogenesis* **21**, 461-7 (2000).
18. Torrey, E.F., Webster, M., Knable, M., Johnston, N. & Yolken, R.H. The stanley foundation brain collection and neuropathology consortium. *Schizophr Res* **44**, 151-5 (2000).
